# Supplementary material for: Simultaneous evolutionary expansion and constraint of genomic heterogeneity in multifocal lung cancer
Source: PubMed Central journal article supplement (PMC5634994; doi:10.1038/s41467-017-00963-0), 2017-10-10
Supplement: 41467_2017_963_MOESM1_ESM.pdf [file 41467_2017_963_MOESM1_ESM.pdf]

### **Description of Supplementary Files**

File Name: Supplementary Information

Description: Supplementary Figures and Supplementary Tables

File Name: Supplementary Data 1

Description: Identification of 167-679 somatic alterations per tumor, including a total of 373 non-synonymous exonic mutations present in at least one tumor region.

File Name: Peer Review File

Supplementary Figure 1.

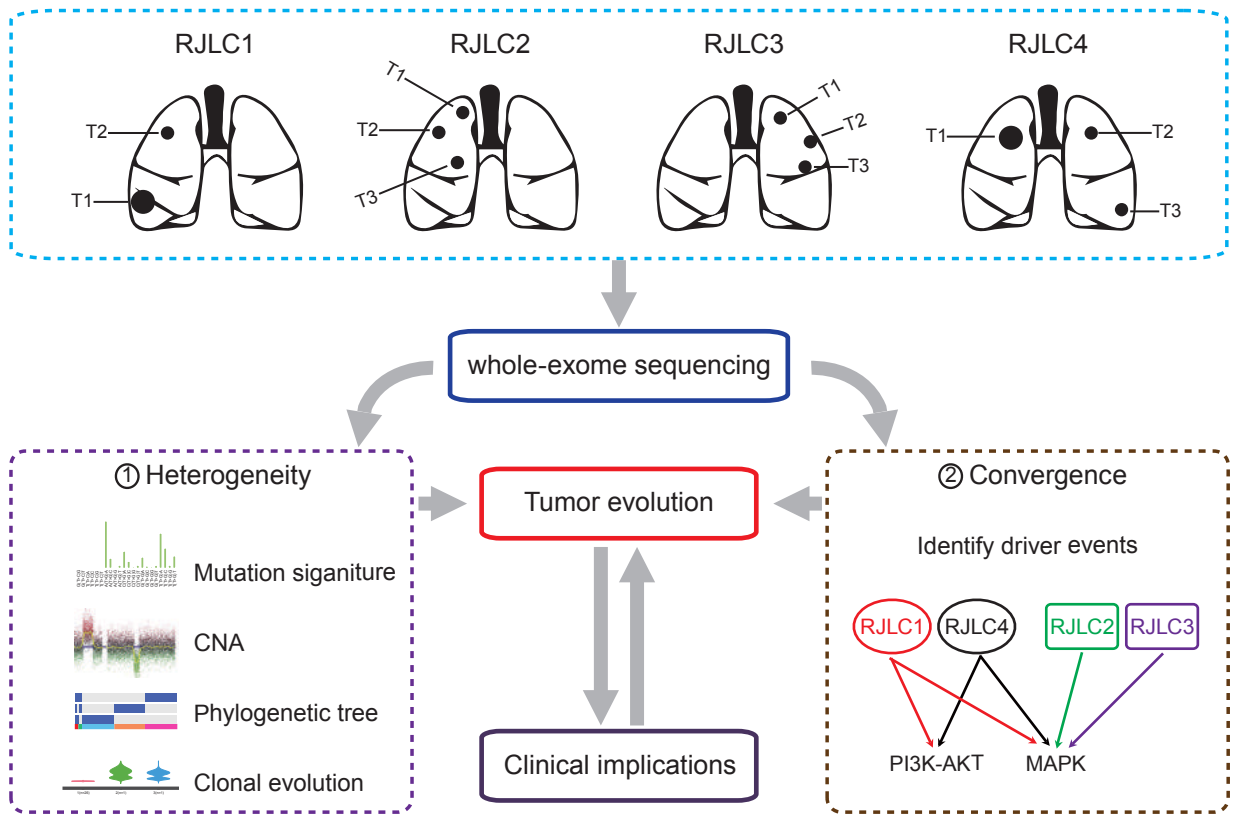

Supplementary Figure 1. A schematic overview of the study design.

Supplementary Figure 2.

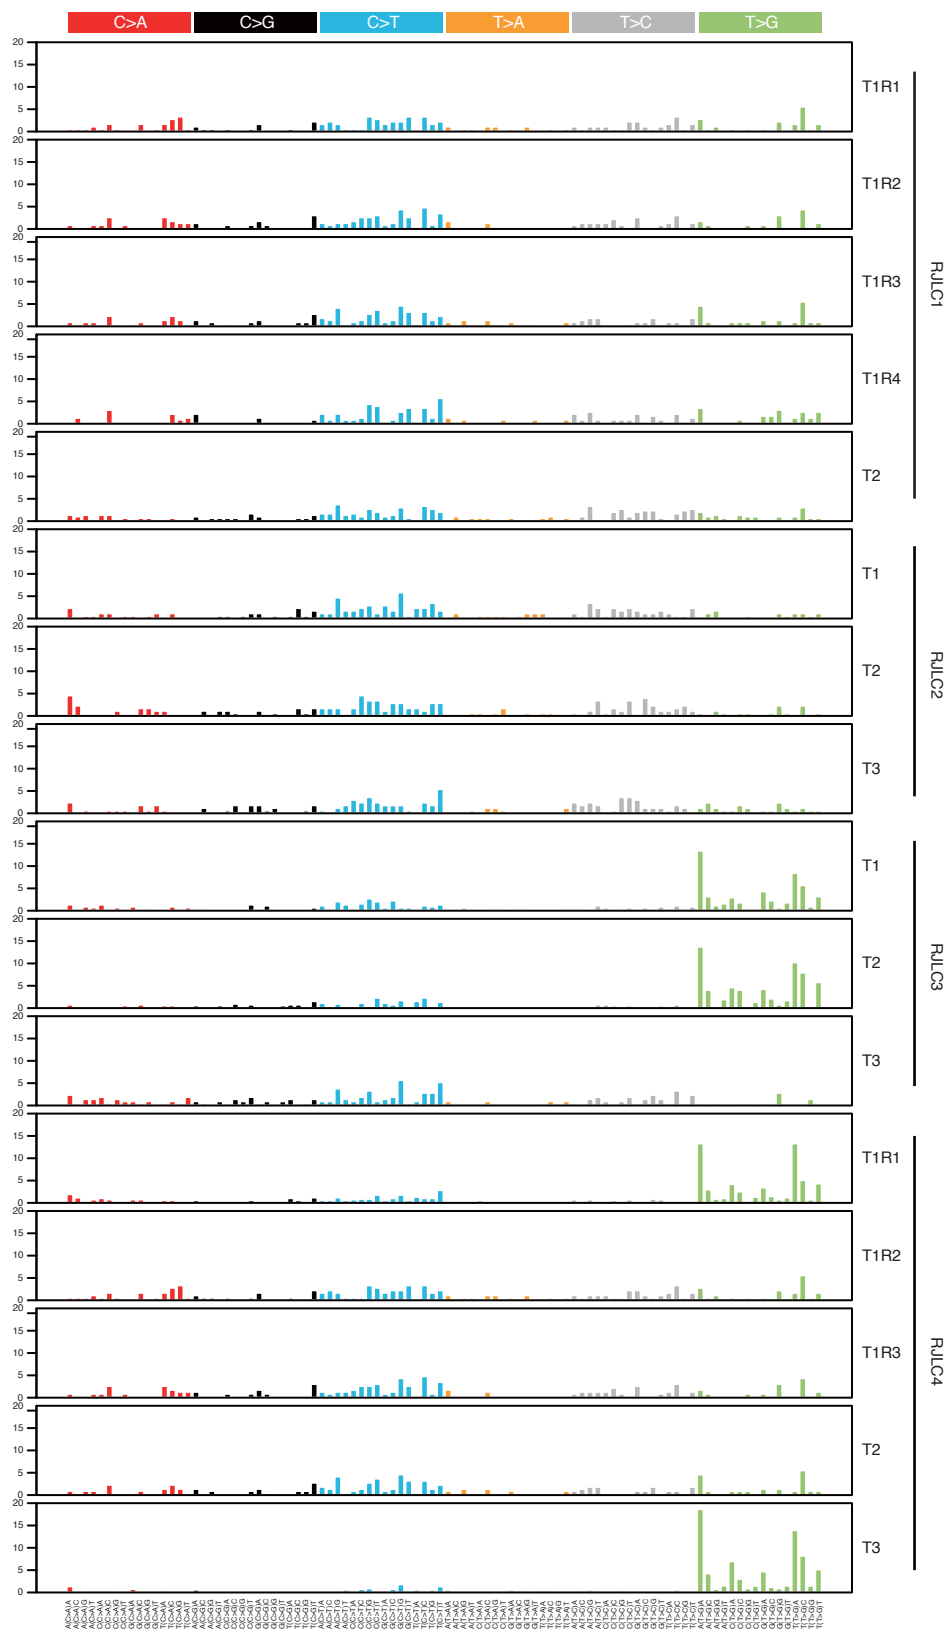

Supplementary Figure 2. Mutational signatures of sequenced tumor samples.

Supplementary Figure 3.

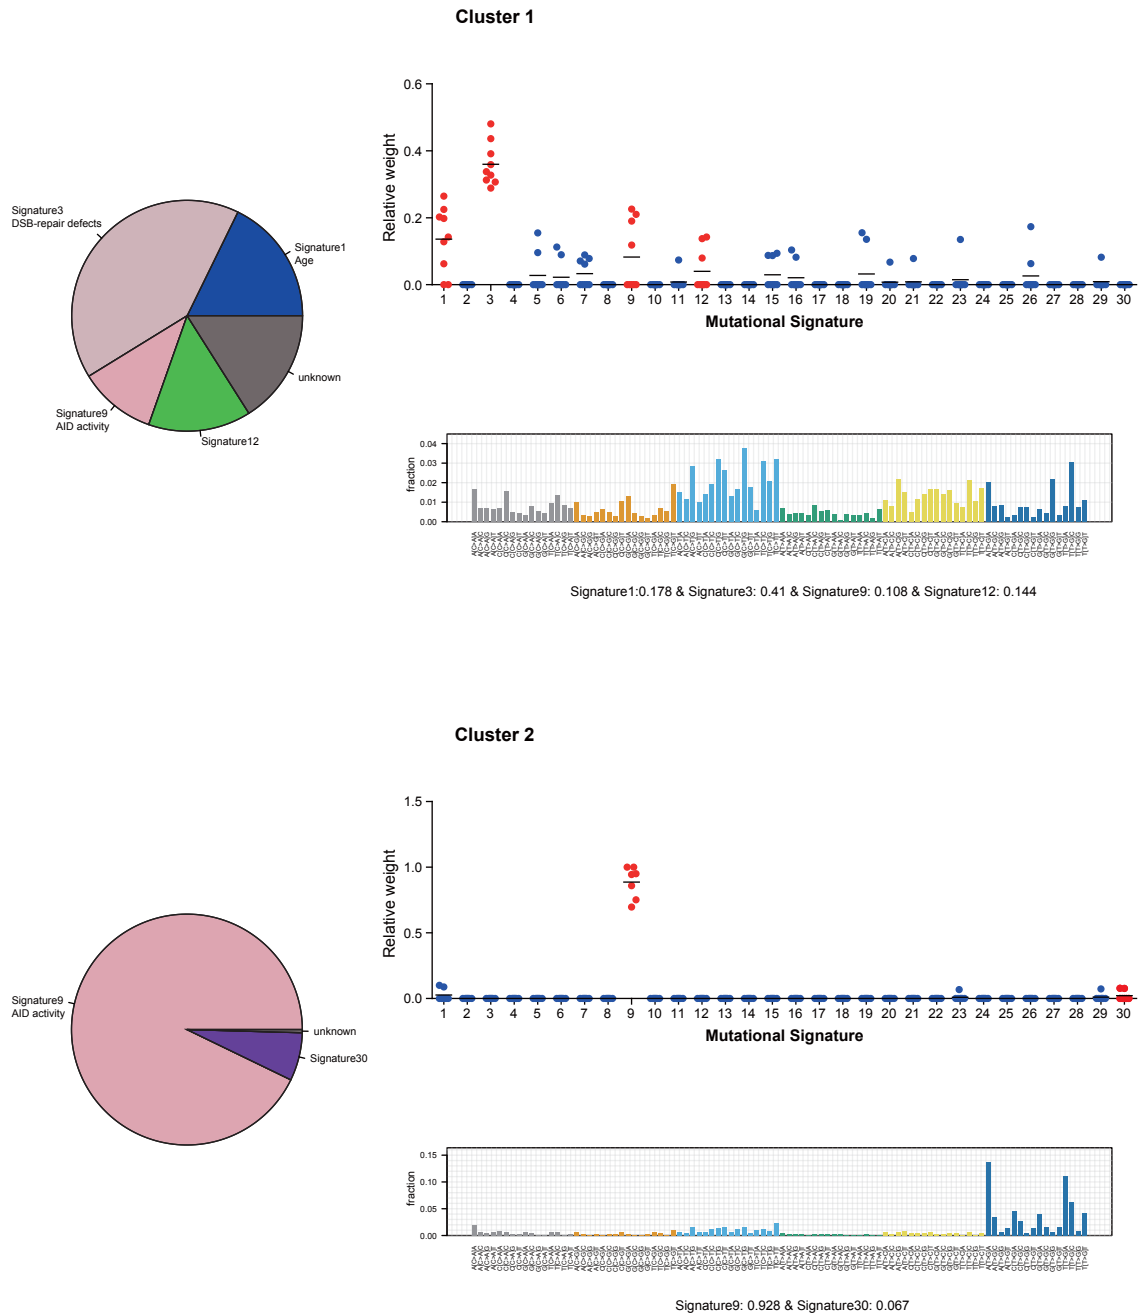

Supplementary Figure 3. A multiple regression approach, deconstructSigs, was used to extract known signatures based on the Wellcome Trust Sanger Institute Mutational Signature Framework and to statistically quantify the contribution of each signature for each cluster.

Supplementary Figure 4.

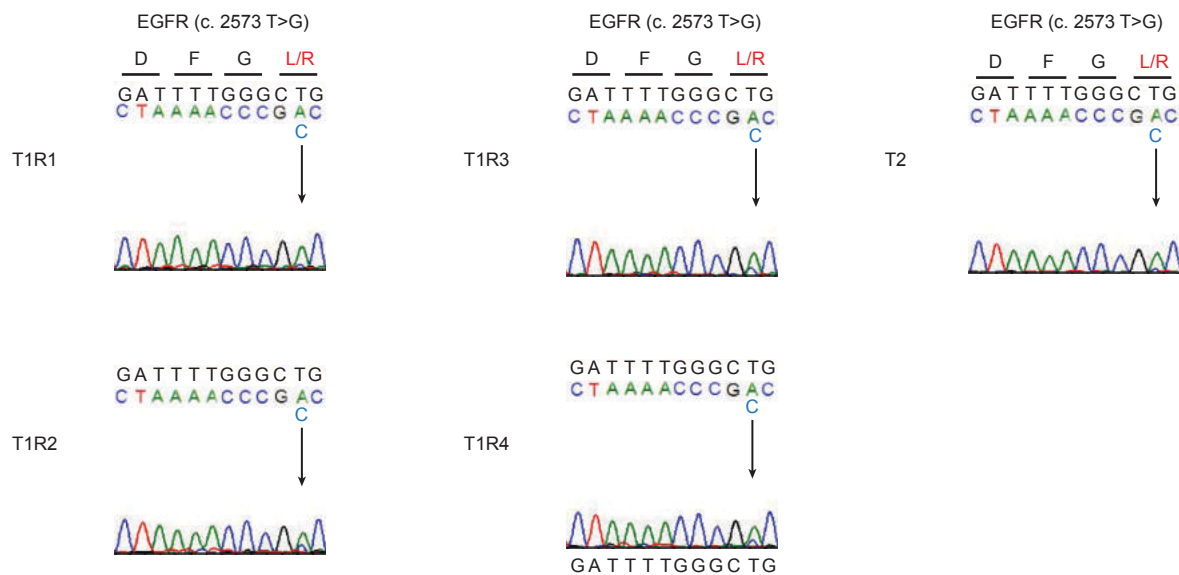

Supplementary Figure 4. Sanger sequencing validation of EGFR mutation in RJLC1.

Supplementary Figure 5.

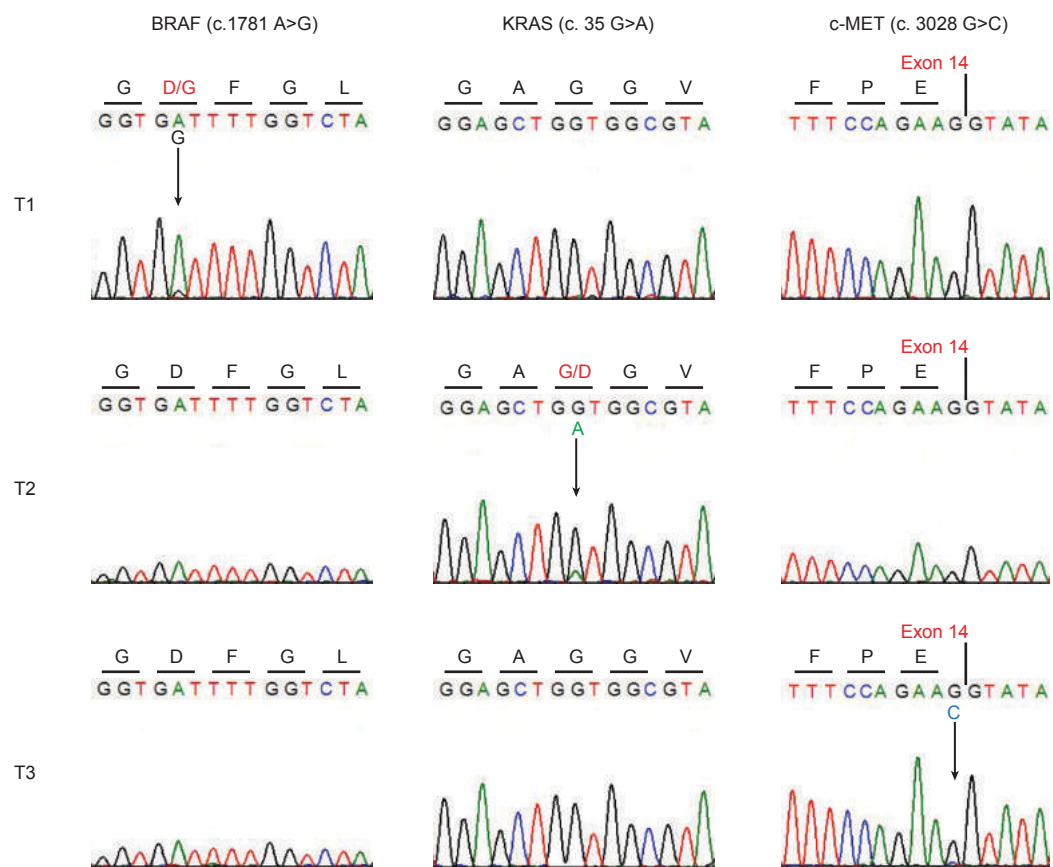

Supplementary Figure 5. Sanger sequencing validation of BRAF, KRAS and c-MET mutations in RJLC2.

Supplementary Figure 6.

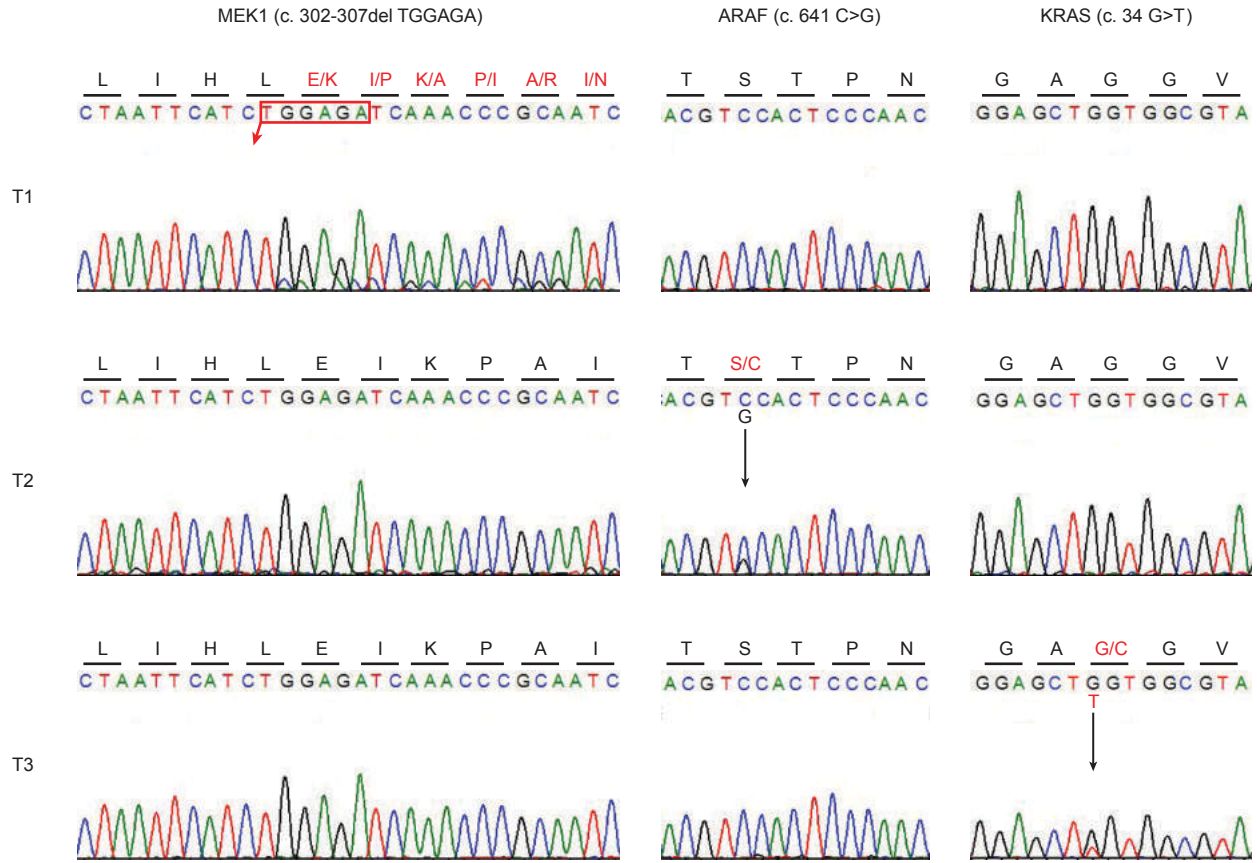

Supplementary Figure 6. Sanger sequencing validation of MEK1, ARAF and KRAS mutations in RJLC3.

Supplementary Figure 7.

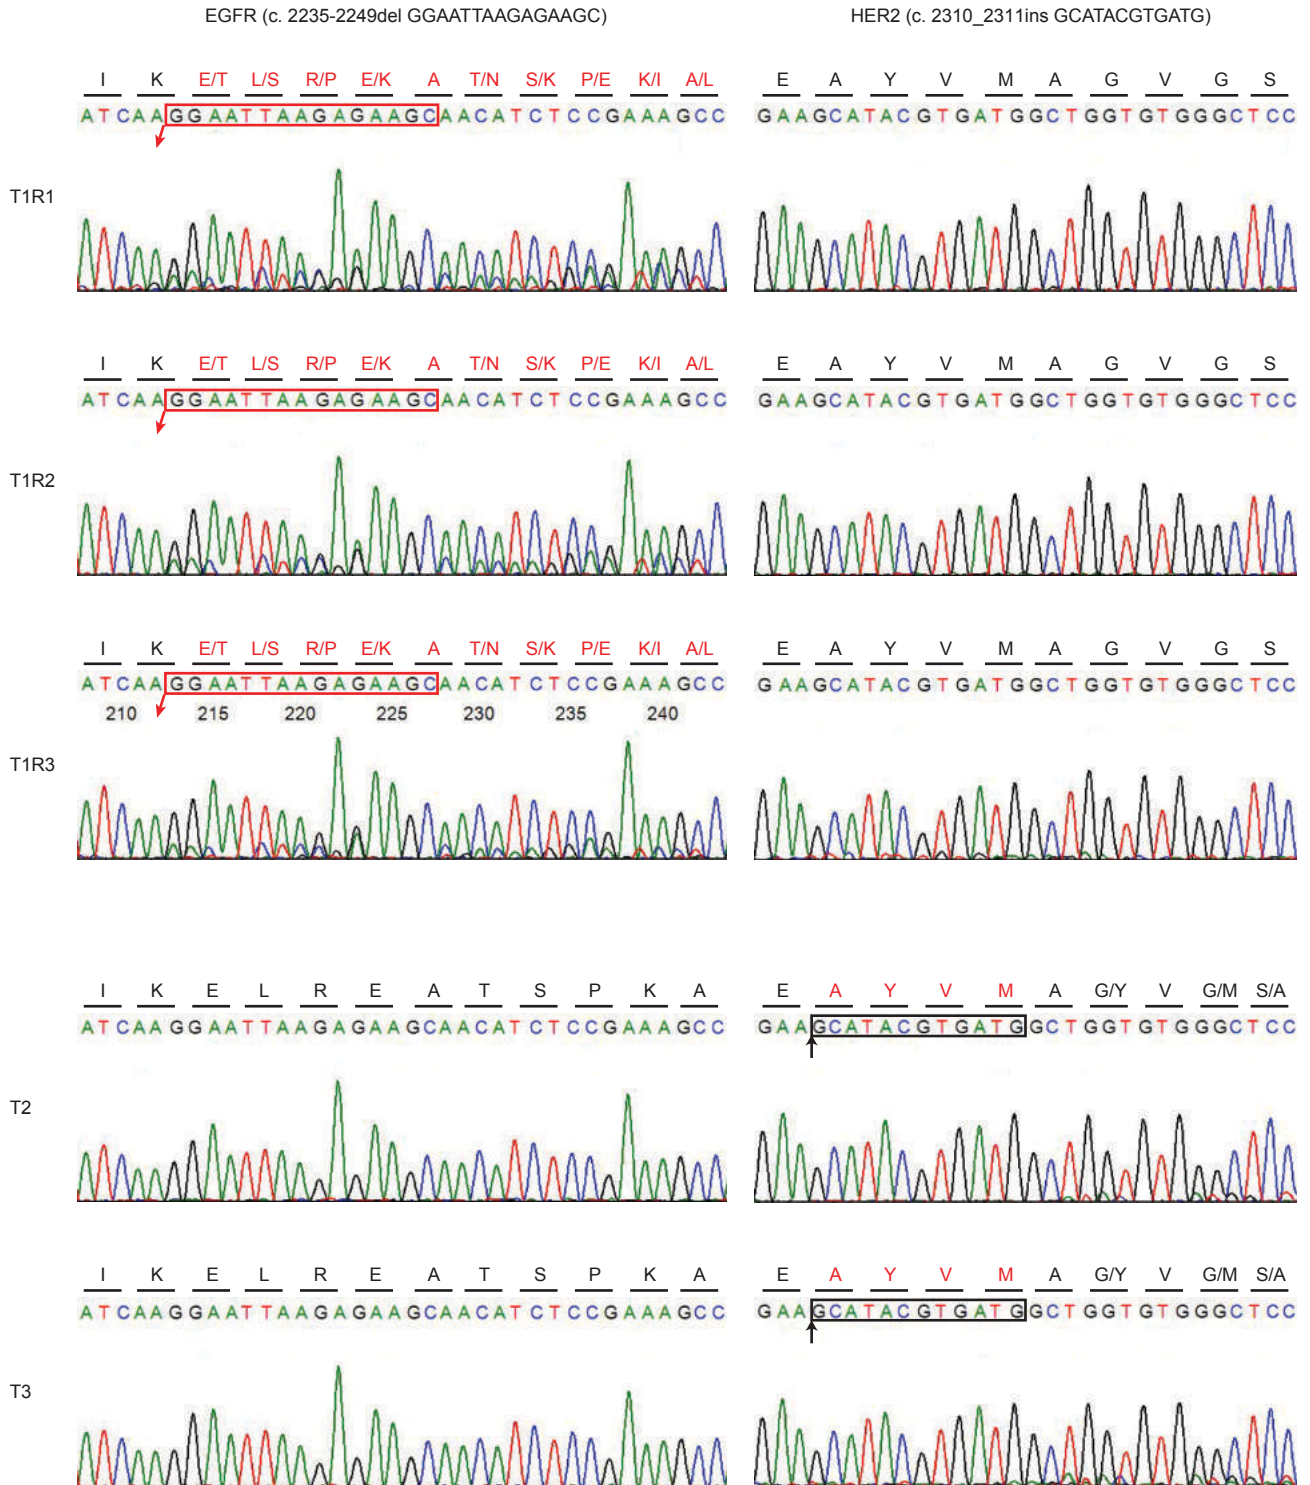

Supplementary Figure 7. Sanger sequencing validation of EGFR and HER2 mutations in RJLC4.



Supplementary Figure 8.

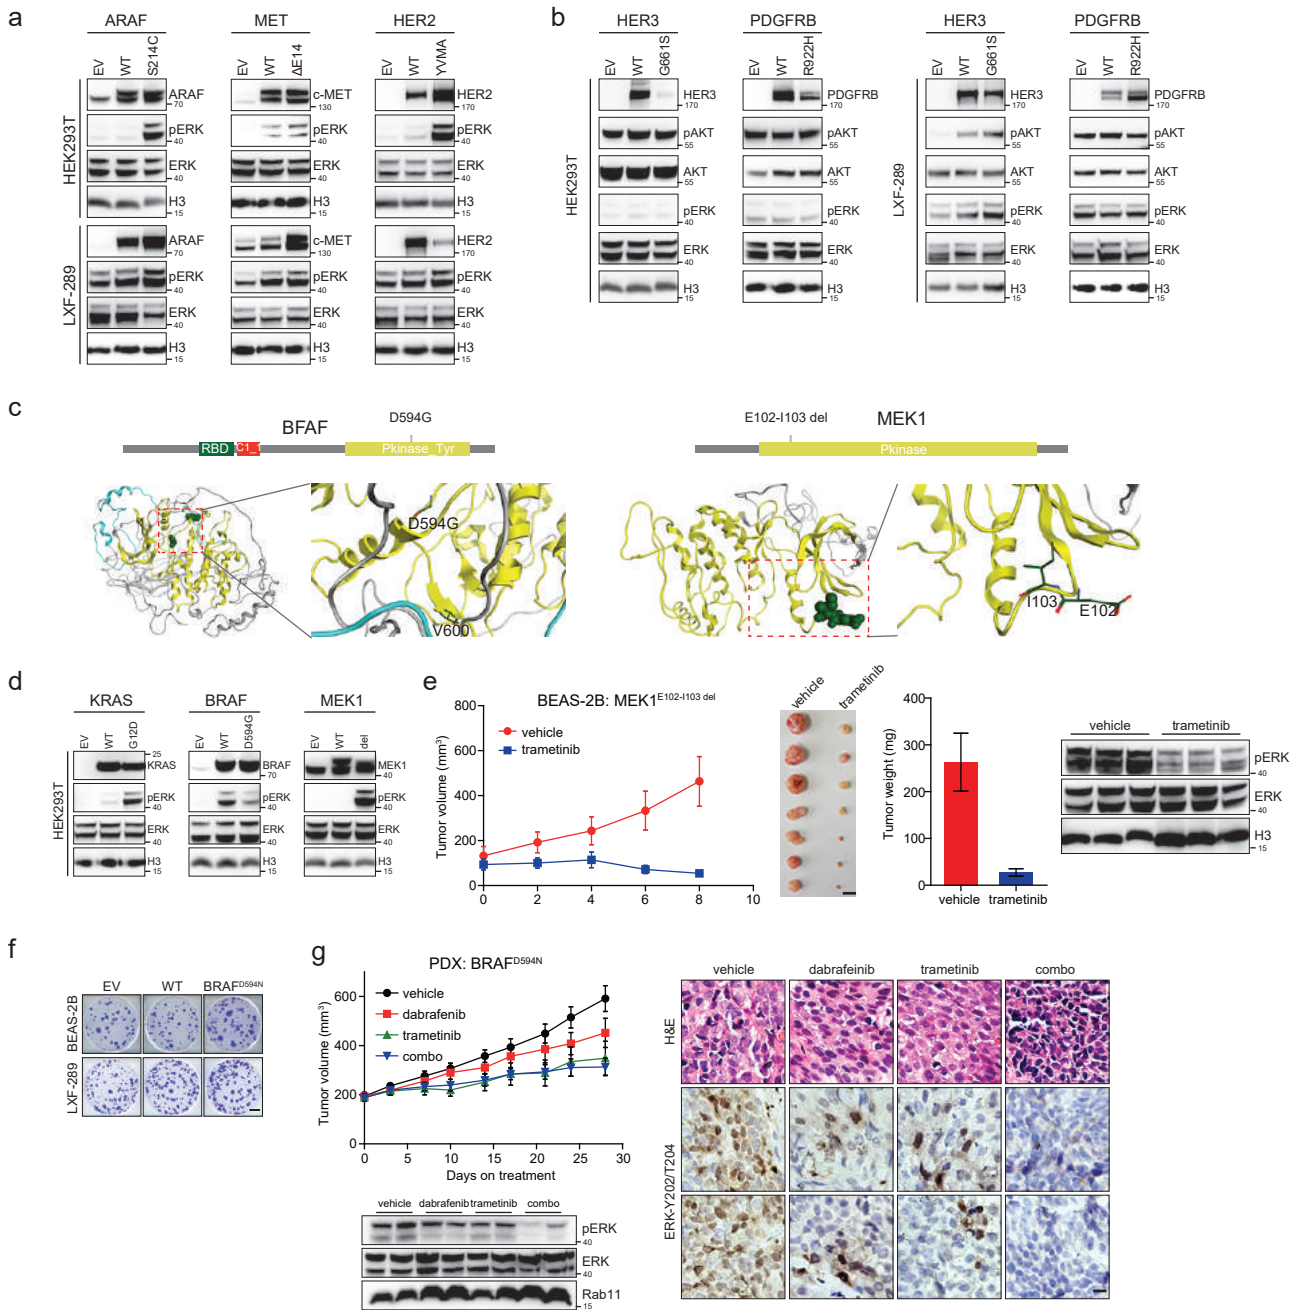

Supplementary Figure 8. (a) Overexpression of indicated wild-type or mutant genes in HEK293T or LXF-289 cells. Gene expression and ERK phosphorylation were measured by immunoblotting. (b) Overexpression of indicated wild-type or mutant genes in HEK293T or LXF-289 cells. AKT and ERK phosphorylation was measured by immunoblotting. (c) The mutated protein structures were generated by Phyre2 web portal and figures were prepared by using PyMOL. (d) Overexpression of indicated wild-type or mutant genes in HEK293T cells. Gene expression and ERK phosphorylation were measured by immunoblotting. (e) Tumor growth of BEAS-2B xenografts treated with trametinib or vehicle control. Each line represented mean tumor volume of the respective group, and error bars indicated standard deviation (10 mice per group). ERK phosphorylation was measured by immunoblotting. Scale bar, 10 mm. (f) Indicated wild-type or mutant genes were lentivirally introduced into BEAS-2B or LXF-289 cells. Cells were cultured for two weeks and stained with crystal violet. Scale bar, 5 mm. (g) Tumor growth of BRAF<sup>D594N</sup> PDX treated with indicated drugs. Each line represented mean tumor volume of the respective group, and error bars indicated standard deviation (10 mice per group). ERK phosphorylation was measured by immunoblotting or IHC. Scale bar, 5  $\mu$ m.

Supplementary Figure 9.

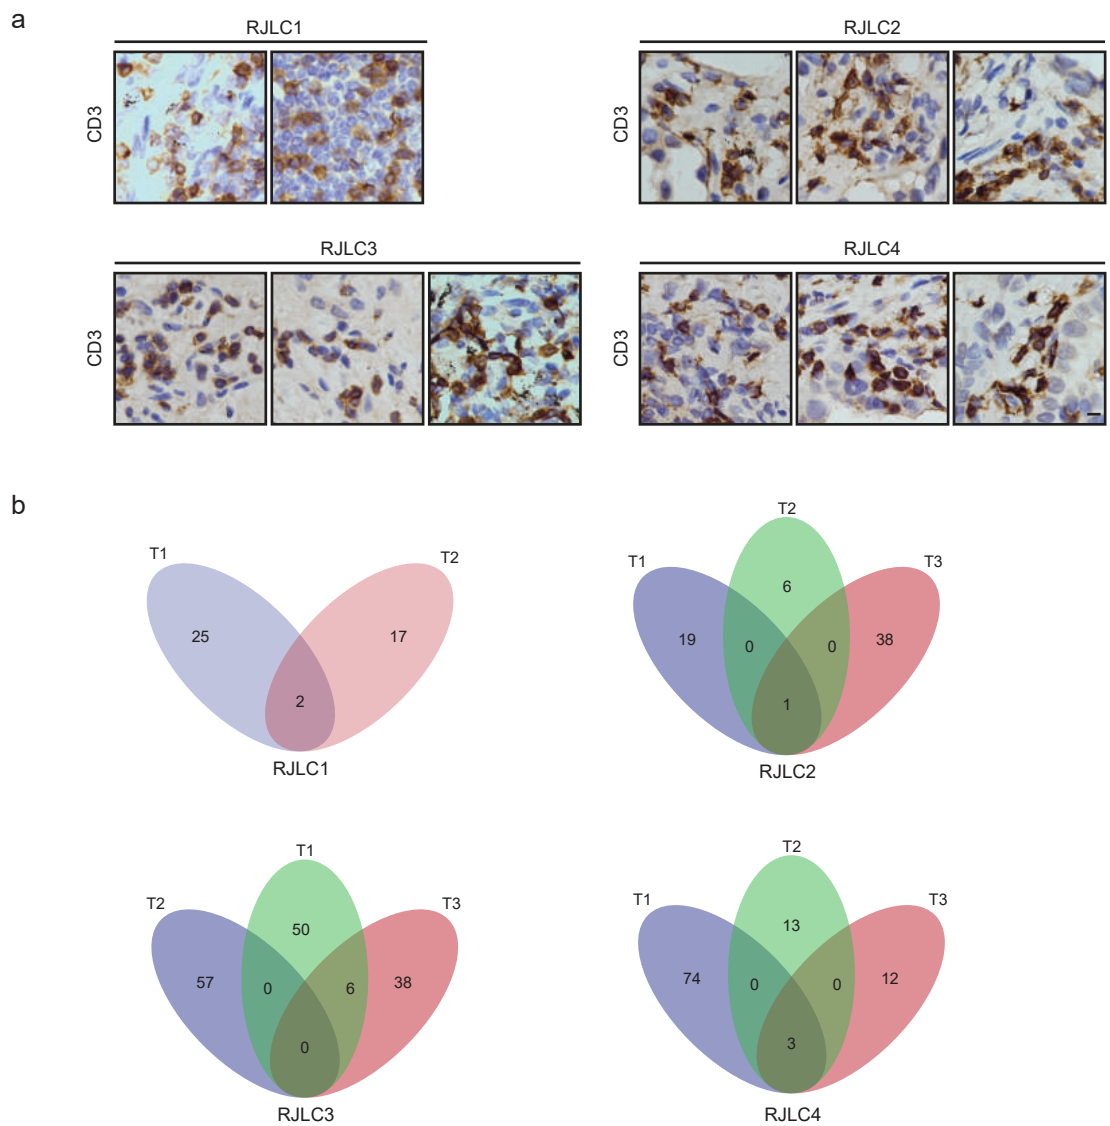

Supplementary Figure 9. (a) IHC of CD3 in different MSLC tumors. Scale bar, 5  $\mu$ m. (b) Load and overlap of predicted neoantigens in each MSLC case using NetMHCpan algorithm.

Supplementary Figure 10.

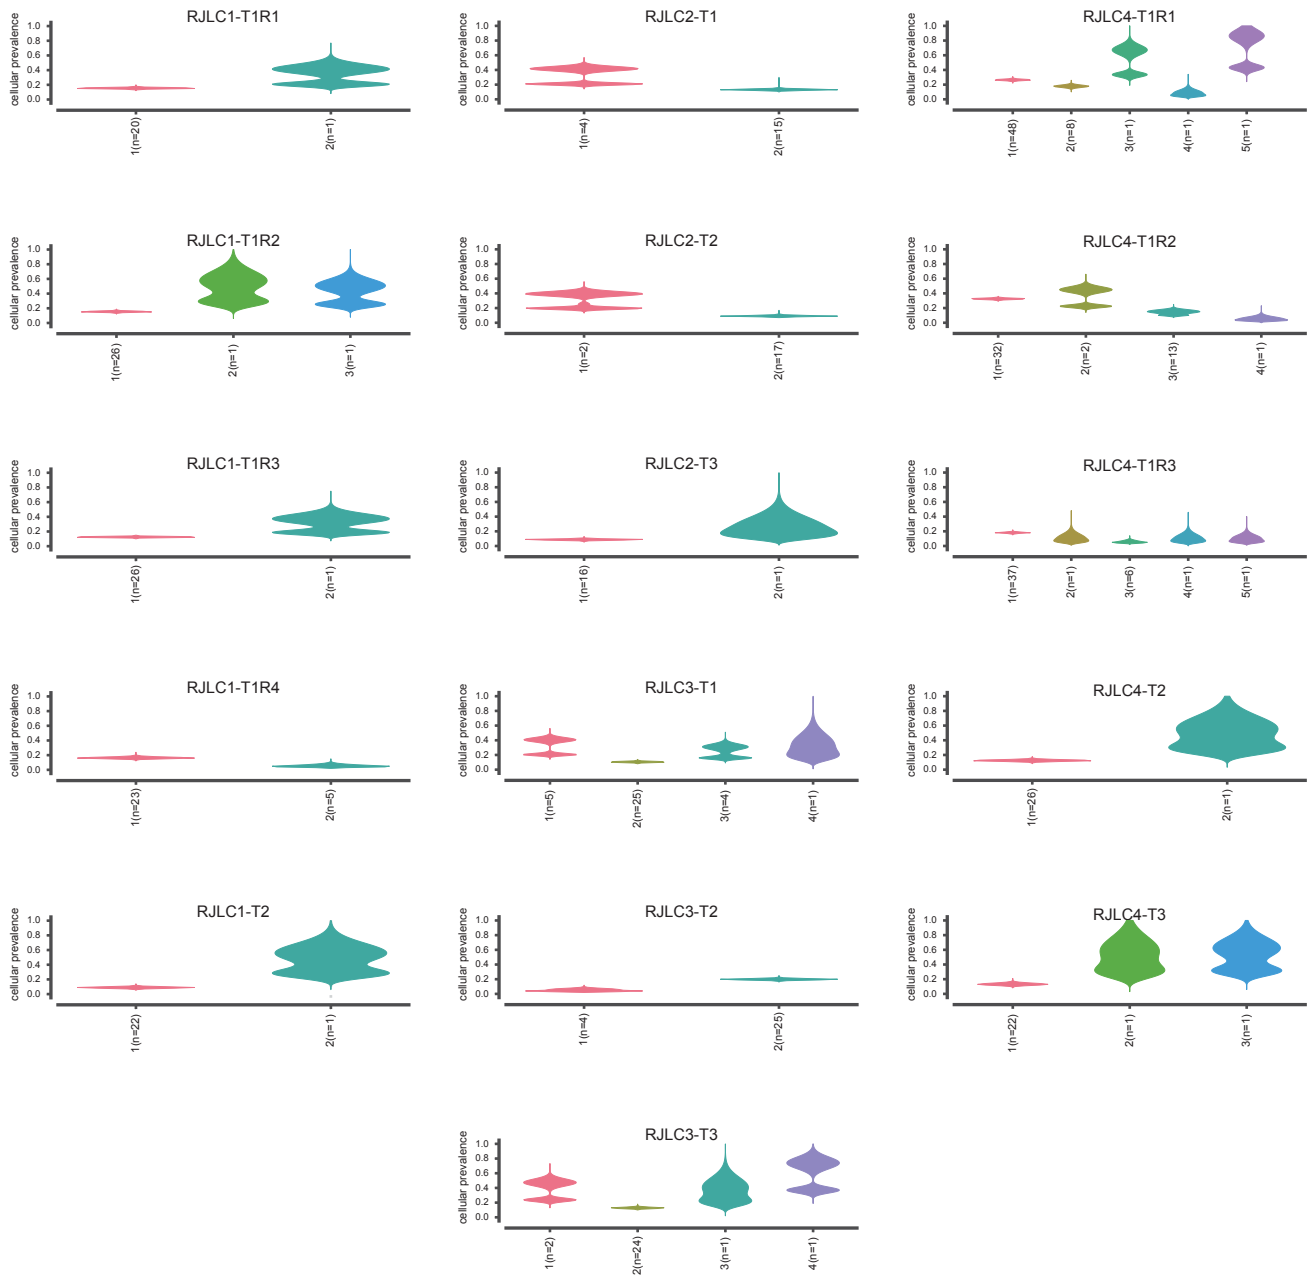

Supplementary Figure 10. PyClone analysis of sequenced tumor samples.

# Supplementary Figure 11.

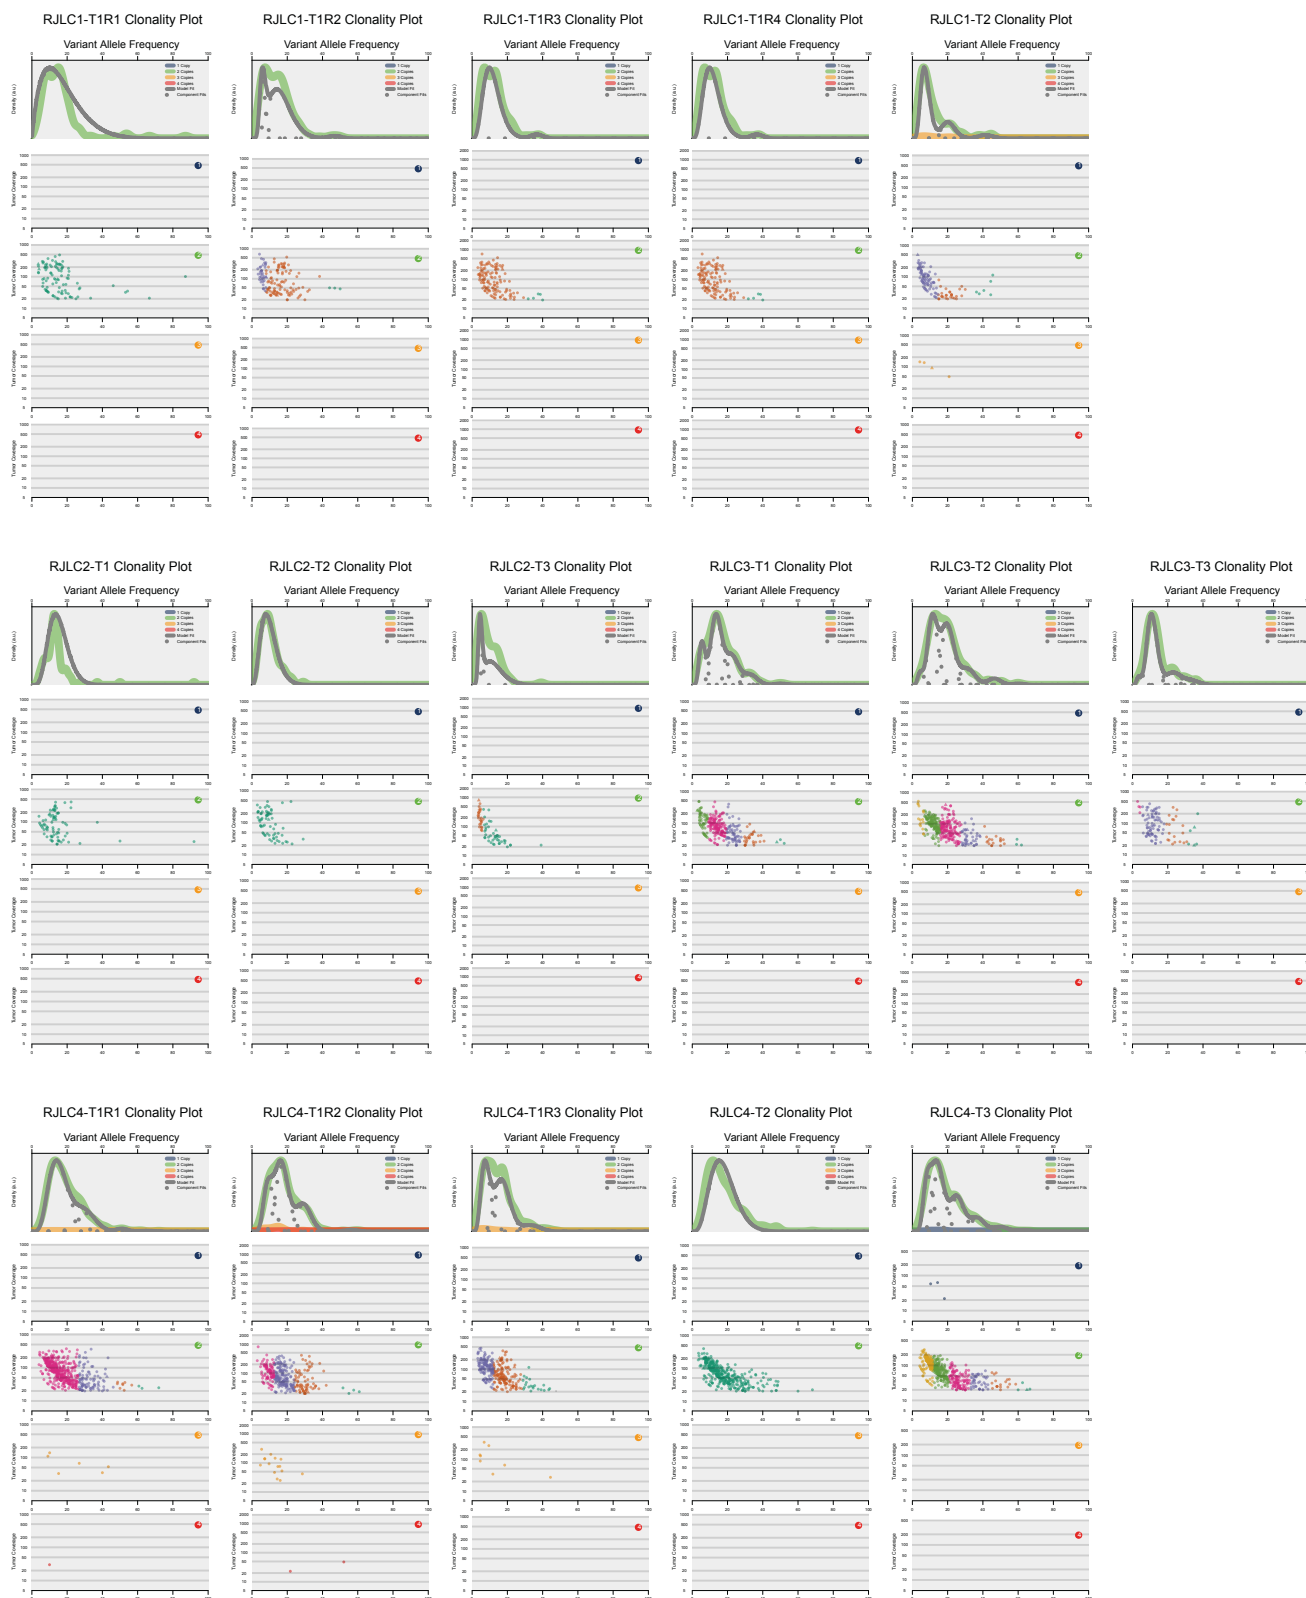

Supplementary Figure 11. SciClone analysis of sequenced tumor samples.

## Supplementary Figure 12.

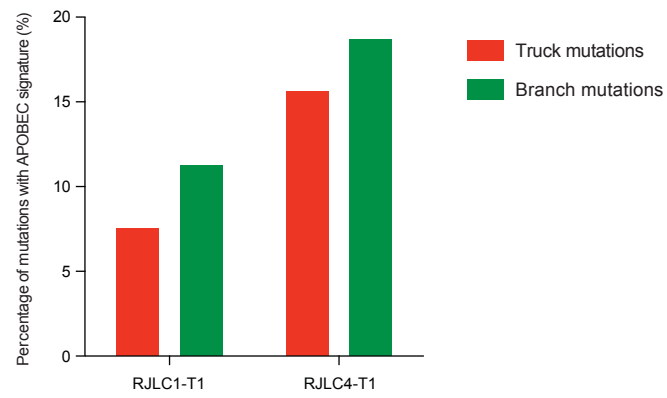

Supplementary Figure 12. Percentage of mutations with APOBEC signature for trunk and branch mutations in two M-seq tumors.

Supplementary Figure 13.

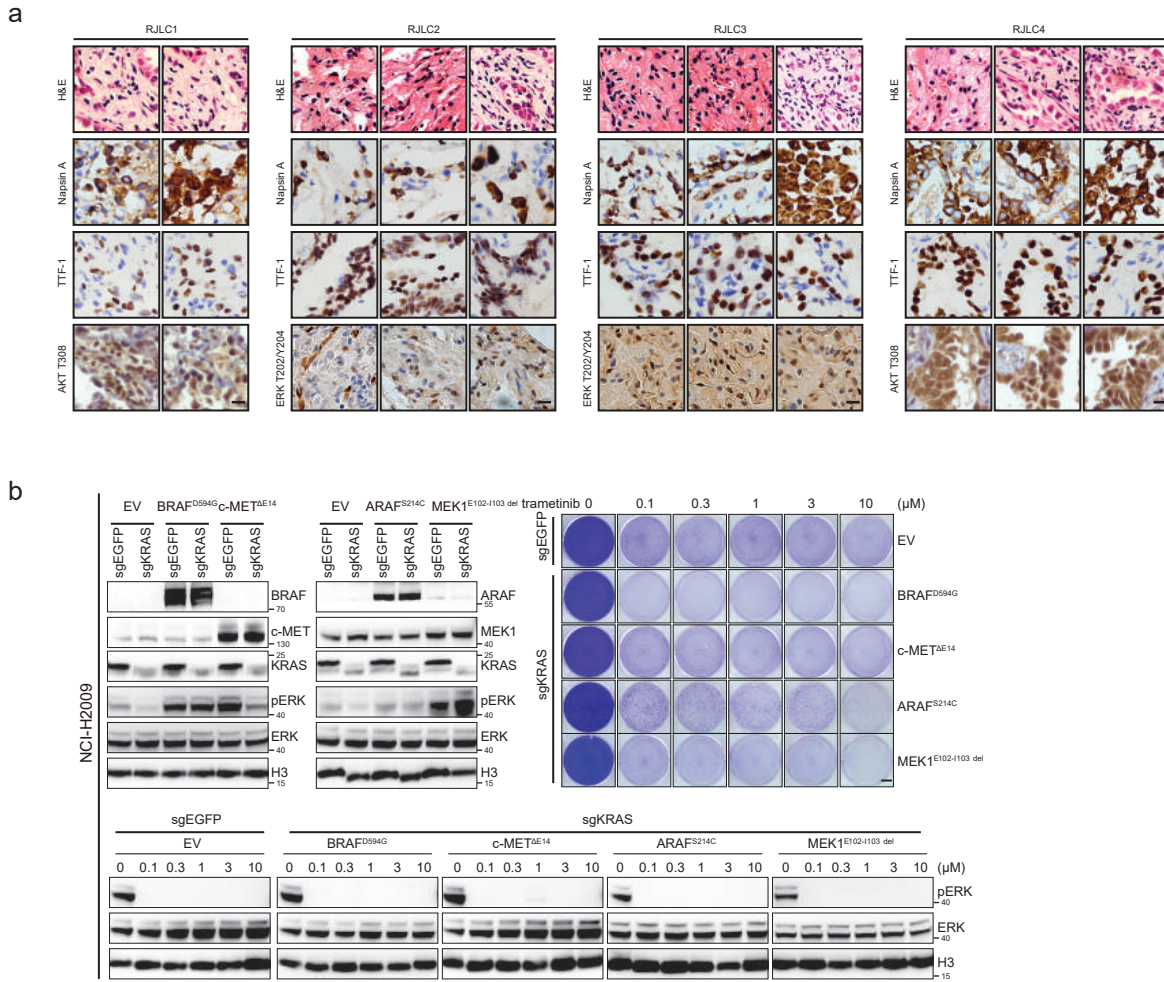

Supplementary Figure 13. (a) H&E and IHC of indicated markers in different MSLC tumors. Scale bar, 5  $\mu\text{m}$ . (b) KRAS was knocked out using CRISPR-Cas9 system in NCI-H2009 cells and replaced with BRAF<sup>D594G</sup>, c-MET <sup>$\Delta$ E14</sup>, ARAF<sup>S214C</sup> or MEK1<sup>E102-1103 del</sup>. ERK phosphorylation was measured by Western blot analysis. Indicated cells were treated with a serial dilution of trametinib for a week and stained with crystal violet. Scale bar, 5 mm. The corresponding cell lysates were analyzed by immunoblotting.

Supplementary Figure 14.

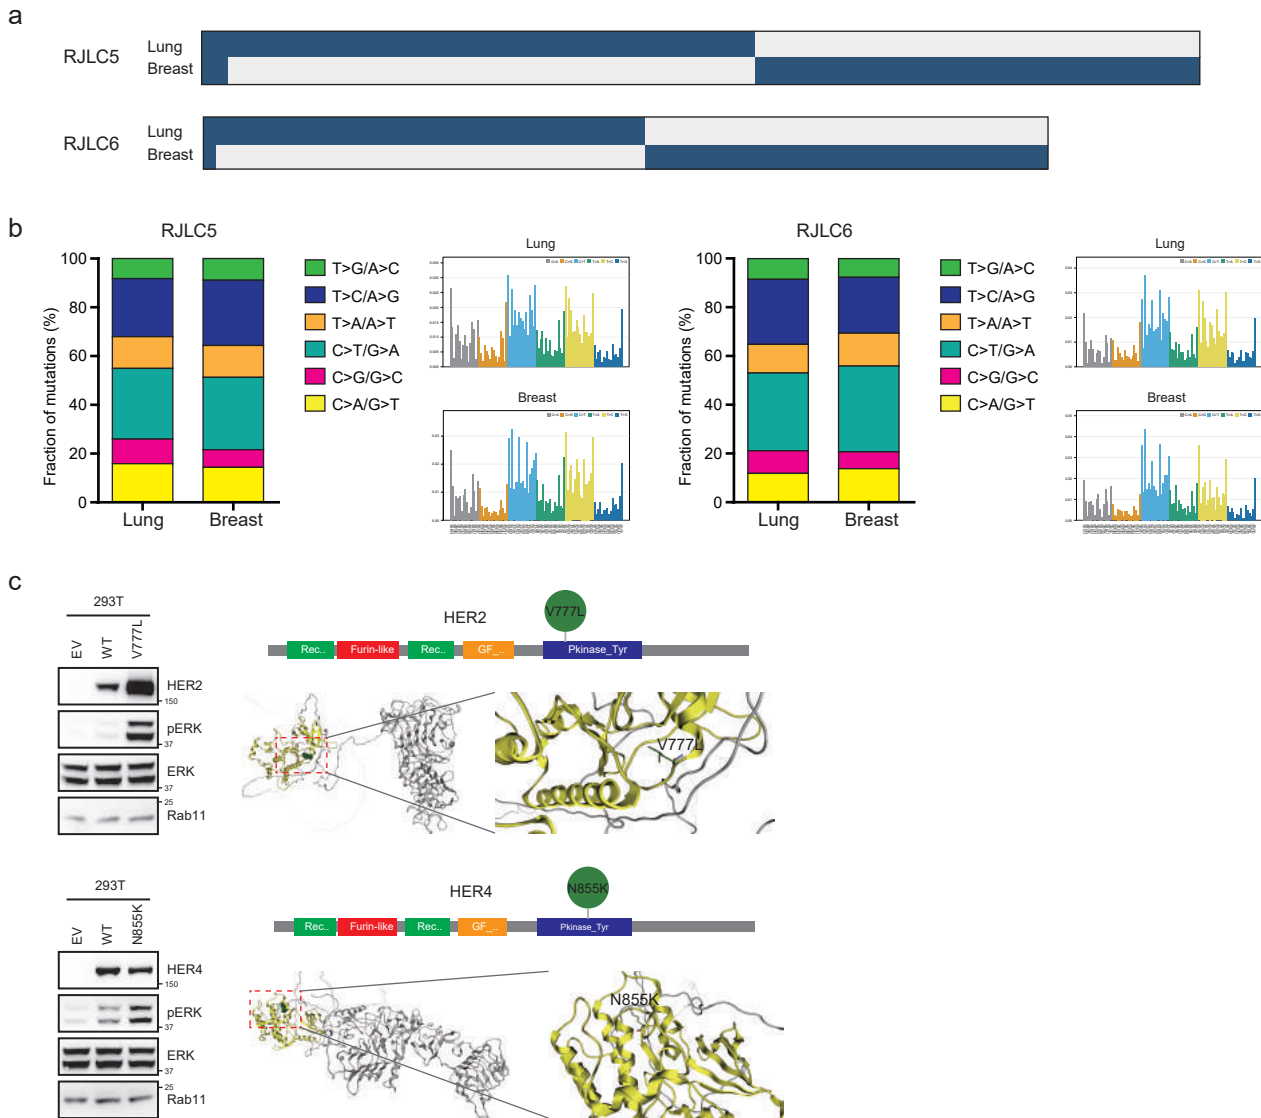

Supplementary Figure 14. (a) Heat maps showed the presence (blue) or absence (gray) of all non-silent somatic mutations in lung and breast tumors. (b) Mutation spectra and mutational signatures of lung and breast tumors in RJLC5 and RJLC6. (c) Overexpression of indicated wild-type or mutant genes in HEK293T cells. Gene expression and ERK phosphorylation were measured by immunoblotting. The mutated protein structures were generated by Phyre2 web portal and figures were prepared by using PyMOL.

# Supplementary Figure 15.

a

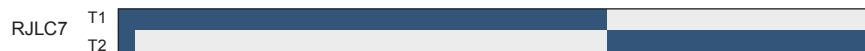

b

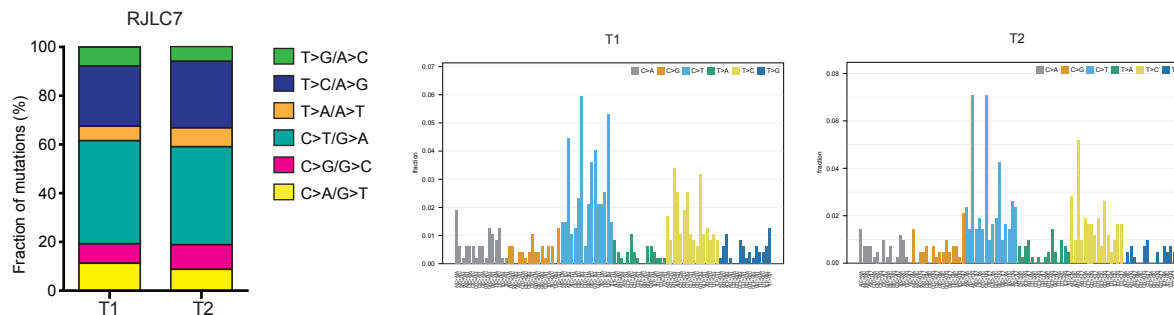

Supplementary Figure 15. (a) Heat maps showed the presence (blue) or absence (gray) of all non-silent somatic mutations in two tumors of RJLC7. (b) Mutation spectra and mutational signatures of two tumors in RJLC7.



# Supplementary Figure 16.

Figure 2c

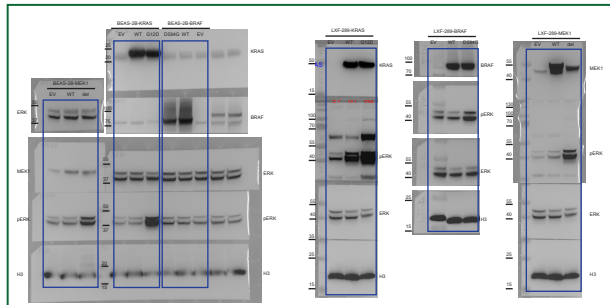

Figure 3d

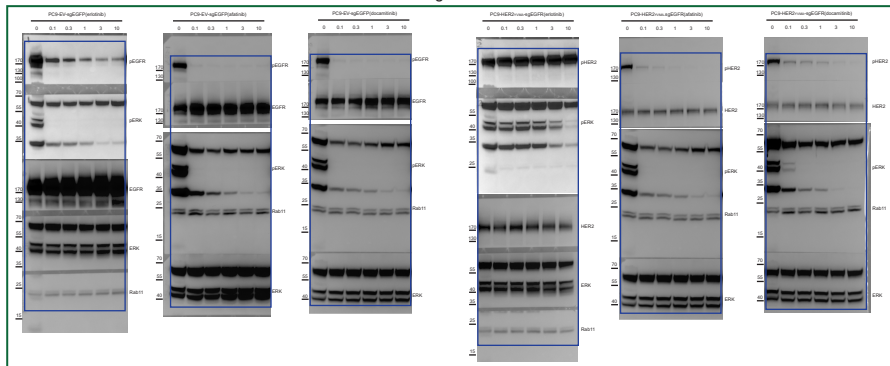

Figure 3c

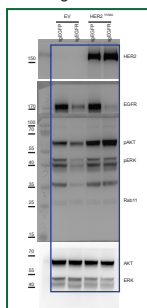

Figure 3e

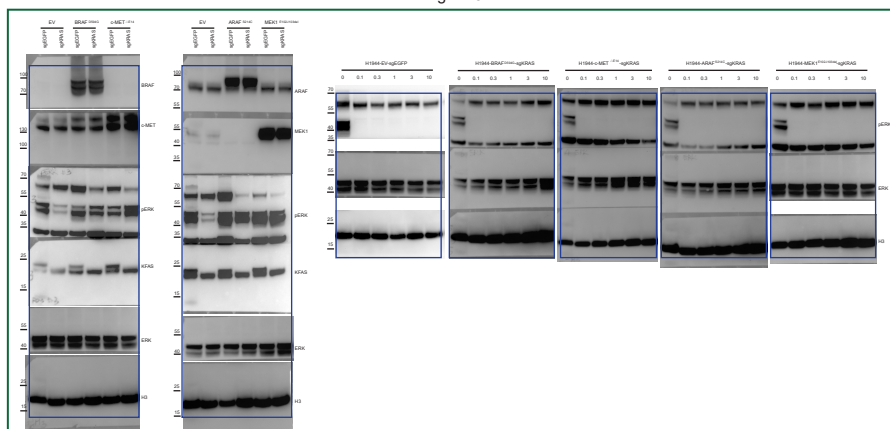

Supplementary Figure 8a

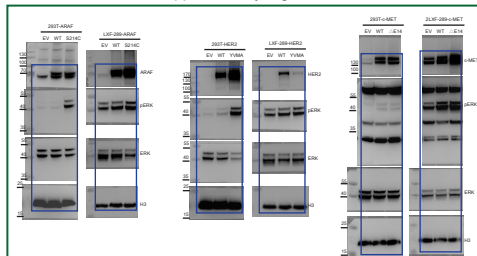

Supplementary Figure 8b

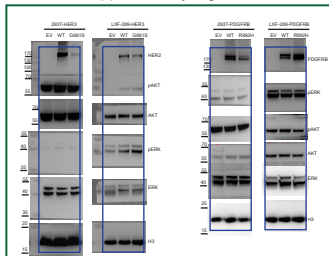

Supplementary Figure 8d

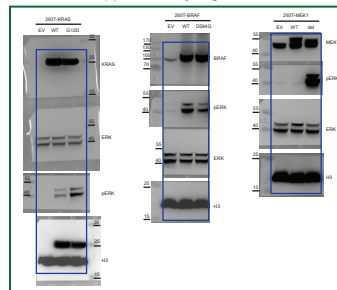

Supplementary Figure 8e

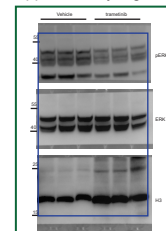

Supplementary Figure 8g

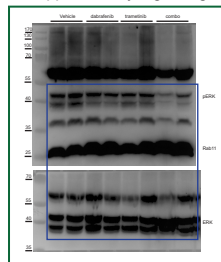

Supplementary Figure 13b

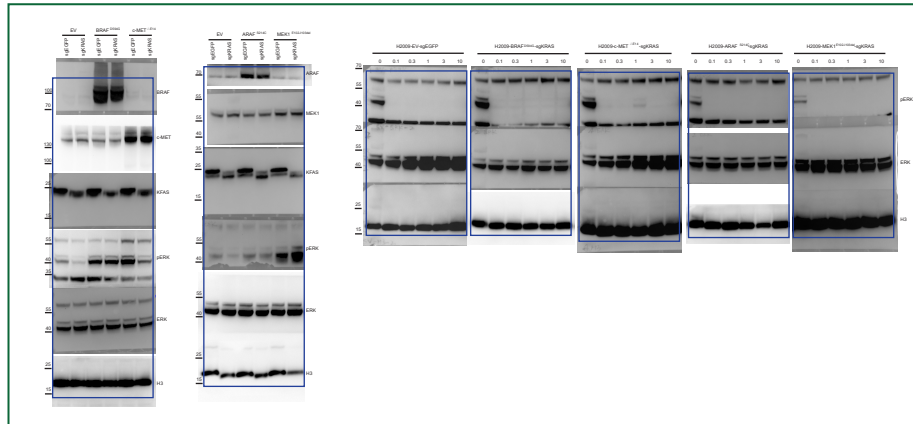

Supplementary Figure 14c

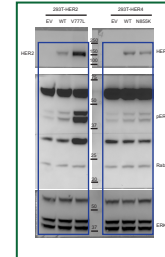

## Supplementary Table 1: Sequencing statistics

| Sample ID  | Description | Tissue | Coverage | >20X Coverage | Somatic SNVs | Mutation Rate | Protein-altering SNVs | Somatic Indels | Somatic CNVs | CNV gain | CNV loss |
|------------|-------------|--------|----------|---------------|--------------|---------------|-----------------------|----------------|--------------|----------|----------|
| RJLC1-N    | Normal      | Frozen | 236.22   | 99.30%        | NA           | NA            | NA                    | NA             | NA           | NA       | NA       |
| RJLC1-T1R1 | Tumor       | Frozen | 262.55   | 99.30%        | 180          | 0.658         | 28                    | 1              | 48           | 36       | 12       |
| RJLC1-T1R2 | Tumor       | Frozen | 295.77   | 99.40%        | 232          | 0.897         | 35                    | 5              | 15           | 14       | 1        |
| RJLC1-T1R3 | Tumor       | Frozen | 281.14   | 99.40%        | 219          | 0.877         | 33                    | 3              | 25           | 23       | 2        |
| RJLC1-T1R4 | Tumor       | Frozen | 281.36   | 99.40%        | 229          | 0.797         | 32                    | 3              | 25           | 25       | 0        |
| RJLC1-T2   | Tumor       | Frozen | 249.27   | 99.30%        | 296          | 0.758         | 26                    | 2              | 199          | 199      | 0        |
| RJLC2-N    | Normal      | Frozen | 249.33   | 99.40%        | NA           | NA            | NA                    | NA             | NA           | NA       | NA       |
| RJLC2-T1   | Tumor       | Frozen | 256.62   | 99.40%        | 173          | 0.578         | 21                    | 2              | 26           | 26       | 0        |
| RJLC2-T2   | Tumor       | Frozen | 265.06   | 99.40%        | 177          | 0.458         | 20                    | 3              | 34           | 32       | 2        |
| RJLC2-T3   | Tumor       | Frozen | 263.22   | 99.40%        | 167          | 0.538         | 20                    | 2              | 49           | 47       | 2        |
| RJLC3-N    | Normal      | Frozen | 243.74   | 99.40%        | NA           | NA            | NA                    | NA             | NA           | NA       | NA       |
| RJLC3-T1   | Tumor       | Frozen | 234.68   | 99.50%        | 443          | 0.857         | 35                    | 4              | 88           | 88       | 0        |
| RJLC3-T2   | Tumor       | Frozen | 211.45   | 99.10%        | 525          | 0.818         | 30                    | 9              | 58           | 44       | 14       |
| RJLC3-T3   | Tumor       | Frozen | 225.54   | 99.30%        | 224          | 0.797         | 31                    | 13             | 73           | 72       | 1        |
| RJLC4-N    | Normal      | Frozen | 243.43   | 99.40%        | NA           | NA            | NA                    | NA             | NA           | NA       | NA       |
| RJLC4-T1R1 | Tumor       | Frozen | 221.46   | 99.30%        | 679          | 1.500         | 59                    | 11             | 311          | 308      | 3        |
| RJLC4-T1R2 | Tumor       | Frozen | 235.33   | 99.40%        | 531          | 1.375         | 51                    | 10             | 747          | 714      | 33       |
| RJLC4-T1R3 | Tumor       | Frozen | 214.65   | 99.30%        | 441          | 1.356         | 52                    | 8              | 282          | 279      | 3        |
| RJLC4-T2   | Tumor       | Frozen | 204.98   | 99.20%        | 495          | 0.619         | 28                    | 1              | 32           | 30       | 2        |
| RJLC4-T3   | Tumor       | Frozen | 212.78   | 99.30%        | 662          | 0.638         | 26                    | 3              | 130          | 102      | 28       |

# Supplementary Table 2: Driver mutation analysis

| Human_Symbol | Chromosome | Position  | Ref_Allele | Alt_Allele | Variant_Classification | ACChange                               | dbSNP_RS    | COSMIC          | CGC          | BerVogelstein125 | Comprehensive4v35     | SMG127 | Tumor_Sample_Name | U2B3_u23t     | U2B3_u23twr | U2B3_u23hdv | U2B3_u23t     |
|--------------|------------|-----------|------------|------------|------------------------|----------------------------------------|-------------|-----------------|--------------|------------------|-----------------------|--------|-------------------|---------------|-------------|-------------|---------------|
| EGFR         | 7          | 5525915   | T          | G          | Missense_Mutation      | DSTFM_017723:exon4:c.5252A>G;G178R     |             |                 |              |                  |                       |        | R4.C11.T1R1       | 0.58,0.42,1.0 | 1.0         | 1.0         | 0.83,0.83,3.0 |
| EGFR         | 7          | 5525915   | T          | G          | Missense_Mutation      | EGFR.NM_005228:exon21:c.1257G>G.L858R  | rs121434568 | COSM224a.NSCLCN |              | OncoGene         | High Confidence Drive | 4.60%  | R4.C11.T1R1       | 0.1,0.0       | 0.99,0.0    | 1.0         | 1.00,1.00,0.0 |
| EGFR         | 7          | 5525915   | T          | G          | Missense_Mutation      | SPEG.NM_005878:exon3:c.G175A>A.A297    |             |                 | OSM140561    |                  |                       |        | R4.C11.T1R1       | 0.21,0.79,1.0 | 0.011,0.0   | 0.166,0.0   | 1.1,0.0       |
| RECQL4       | 8          | 145738379 | C          | T          | Missense_Mutation      | RECQL4.NM_004200:exon16:c.G200A>G.G89D |             |                 | n basal cell |                  |                       |        | R4.C11.T1R1       | -             | -           | -           | -             |
| STAG2        | 20         | 39742014  | A          | T          | Missense_Mutation      | STAG2.NM_006003:exon29:c.A322T>T.K1074 |             |                 | elanoma.Ev   | TSG              | High Confidence Drive | 2.20%  | R4.C11.T1R1       | 0.01,0.99,0.0 | 0.921,0.0   | 0.987,0.0   | 1.00,1.00,0.0 |
| TOP1         | 20         | 39742014  | A          | T          | Missense_Mutation      | TOP1.NM_003286:exon15:c.A437A>G.A48V   |             |                 | AML*         |                  |                       |        | R4.C11.T1R1       | 0.1,0.0       | 0.99,0.0    | 1.0         | 1.1,0.0       |
| PLG1         | 20         | 39801264  | G          | A          | Missense_Mutation      | PLG1.NM_002680:exon28:c.G319A>A.P1037  |             |                 | ingiosarcom  |                  | High Confidence Drive | -      | R4.C11.T1R1       | 0.1,0.0       | 0.99,0.0    | 1.0         | 1.1,0.0       |
| MYH11        | 18         | 15841968  | C          | T          | Missense_Mutation      | MYH11.NM_002474:exon17:c.G2116A>G.E79K |             |                 | AML*         |                  |                       |        | R4.C11.T1R2       | 0.1,0.0       | 0.98,0.0    | 1.0         | 1.1,0.0       |
| DST          | 6          | 56505297  | C          | T          | Missense_Mutation      | DSTFM_017723:exon4:c.G32A>G.G178R      |             |                 | AML*         |                  |                       |        | R4.C11.T1R2       | 0.58,0.42,1.0 | 1.0         | 1.0         | 0.83,0.83,3.0 |
| PLG1         | 20         | 39801264  | G          | C          | Missense_Mutation      | PLG1.NM_002680:exon28:c.G292T>C.P578S  |             |                 | ingiosarcom  |                  | High Confidence Drive | 4.60%  | R4.C11.T1R2       | 0.75,0.25,1.0 | 0.03,0.0    | 0.073,0.0   | 1.1,0.0       |
| EGFR         | 7          | 5525915   | T          | G          | Missense_Mutation      | EGFR.NM_005228:exon21:c.1257G>G.L858R  | rs121434568 | COSM224a.NSCLCN |              | OncoGene         | High Confidence Drive | 4.60%  | R4.C11.T1R2       | 0.1,0.0       | 0.99,0.0    | 1.0         | 1.00,1.00,0.0 |
| SPEG         | 2          | 220209843 | A          | T          | Missense_Mutation      | SPEG.NM_005878:exon3:c.G175A>A.A297    |             |                 | OSM140561    |                  |                       |        | R4.C11.T1R2       | 0.21,0.79,1.0 | 0.011,0.0   | 0.166,0.0   | 1.1,0.0       |
| RECQL4       | 8          | 145738379 | C          | T          | Missense_Mutation      | RECQL4.NM_004200:exon16:c.G200A>G.G89D |             |                 | n basal cell |                  |                       |        | R4.C11.T1R2       | 0.1,0.0       | 0.99,0.0    | 1.0         | 1.00,1.00,0.0 |
| STAG2        | 20         | 39742014  | A          | T          | Missense_Mutation      | STAG2.NM_006003:exon29:c.A322T>T.K1074 |             |                 | elanoma.Ev   | TSG              | High Confidence Drive | 2.20%  | R4.C11.T1R2       | 0.01,0.99,0.0 | 0.921,0.0   | 0.987,0.0   | 1.00,1.00,0.0 |
| TOP1         | 20         | 39742014  | A          | T          | Missense_Mutation      | TOP1.NM_003286:exon15:c.A437T>G.A48V   |             |                 | AML*         |                  |                       |        | R4.C11.T1R2       | 0.1,0.0       | 0.99,0.0    | 1.0         | 1.1,0.0       |
| DST          | 6          | 56505297  | C          | T          | Missense_Mutation      | DSTFM_017723:exon4:c.G32A>G.G178R      |             |                 | AML*         |                  |                       |        | R4.C11.T1R2       | 0.58,0.42,1.0 | 1.0         | 1.0         | 0.83,0.83,3.0 |
| PTPRC        | 1          | 198717250 | T          | G          | Missense_Mutation      | PTPRC.NM_009021:exon24:c.T227T>G.Y79D  |             |                 | TALL         |                  |                       |        | R4.C11.T1R2       | 0.1,0.0       | 0.99,0.0    | 1.0         | 1.1,0.0       |
| EGFR         | 7          | 5525915   | T          | G          | Missense_Mutation      | EGFR.NM_005228:exon21:c.1257G>G.L858R  | rs121434568 | COSM224a.NSCLCN |              | OncoGene         | High Confidence Drive | 4.60%  | R4.C11.T1R3       | 0.01,0.99,0.0 | 0.99,0.0    | 1.0         | 1.00,1.00,0.0 |
| SPEG         | 2          | 220209843 | A          | T          | Missense_Mutation      | SPEG.NM_005878:exon3:c.G175A>A.A297    |             |                 | OSM140561    |                  |                       |        | R4.C11.T1R3       | 0.21,0.79,1.0 | 0.011,0.0   | 0.166,0.0   | 1.1,0.0       |
| RECQL4       | 8          | 145738379 | C          | T          | Missense_Mutation      | RECQL4.NM_004200:exon16:c.G200A>G.G89D |             |                 | n basal cell |                  |                       |        | R4.C11.T1R3       | 0.1,0.0       | 0.99,0.0    | 1.0         | 1.00,1.00,0.0 |
| STAG2        | 20         | 39742014  | A          | T          | Missense_Mutation      | STAG2.NM_006003:exon29:c.A322T>T.K1074 |             |                 | elanoma.Ev   | TSG              | High Confidence Drive | 2.20%  | R4.C11.T1R3       | 0.01,0.99,0.0 | 0.921,0.0   | 0.987,0.0   | 1.00,1.00,0.0 |
| TOP1         | 20         | 39742014  | A          | T          | Missense_Mutation      | TOP1.NM_003286:exon15:c.A437T>G.A48V   |             |                 | AML*         |                  |                       |        | R4.C11.T1R3       | 0.1,0.0       | 0.99,0.0    | 1.0         | 1.1,0.0       |
| DST          | 6          | 56505297  | C          | T          | Missense_Mutation      | DSTFM_017723:exon4:c.G32A>G.G178R      |             |                 | AML*         |                  |                       |        | R4.C11.T1R3       | 0.58,0.42,1.0 | 1.0         | 1.0         | 0.83,0.83,3.0 |
| EGFR         | 7          | 5525915   | T          | G          | Missense_Mutation      | EGFR.NM_005228:exon21:c.1257G>G.L858R  | rs121434568 | COSM224a.NSCLCN |              | OncoGene         | High Confidence Drive | 4.60%  | R4.C11.T1R4       | 0.1,0.0       | 0.99,0.0    | 1.0         | 1.00,1.00,0.0 |
| SPEG         | 2          | 220209843 | A          | T          | Missense_Mutation      | SPEG.NM_005878:exon3:c.G175A>A.A297    |             |                 | OSM140561    |                  |                       |        | R4.C11.T1R4       | 0.21,0.79,1.0 | 0.011,0.0   | 0.166,0.0   | 1.1,0.0       |
| RECQL4       | 8          | 145738379 | C          | T          | Missense_Mutation      | RECQL4.NM_004200:exon16:c.G200A>G.G89D |             |                 | n basal cell |                  |                       |        | R4.C11.T1R4       | 0.01,0.99,0.0 | 0.921,0.0   | 0.987,0.0   | 1.00,1.00,0.0 |
| STAG2        | 20         | 39742014  | A          | T          | Missense_Mutation      | STAG2.NM_006003:exon29:c.A322T>T.K1074 |             |                 | elanoma.Ev   | TSG              | High Confidence Drive | 2.20%  | R4.C11.T1R4       | 0.1,0.0       | 0.99,0.0    | 1.0         | 1.1,0.0       |
| TOP1         | 20         | 39742014  | A          | T          | Missense_Mutation      | TOP1.NM_003286:exon15:c.A437T>G.A48V   |             |                 | AML*         |                  |                       |        | R4.C11.T1R4       | 0.1,0.0       | 0.99,0.0    | 1.0         | 1.1,0.0       |
| DST          | 6          | 56505297  | C          | T          | Missense_Mutation      | DSTFM_017723:exon4:c.G32A>G.G178R      |             |                 | AML*         |                  |                       |        | R4.C11.T1R4       | 0.58,0.42,1.0 | 1.0         | 1.0         | 0.83,0.83,3.0 |
| EGFR         | 7          | 5525915   | T          | G          | Missense_Mutation      | EGFR.NM_005228:exon21:c.1257G>G.L858R  | rs121434568 | COSM224a.NSCLCN |              | OncoGene         | High Confidence Drive | 4.60%  | R4.C11.T1R4       | 0.1,0.0       | 0.99,0.0    | 1.0         | 1.00,1.00,0.0 |
| SPEG         | 2          | 220209843 | A          | T          | Missense_Mutation      | SPEG.NM_005878:exon3:c.G175A>A.A297    |             |                 | OSM140561    |                  |                       |        | R4.C11.T1R4       | 0.21,0.79,1.0 | 0.011,0.0   | 0.166,0.0   | 1.1,0.0       |
| RECQL4       | 8          | 145738379 | C          | T          | Missense_Mutation      | RECQL4.NM_004200:exon16:c.G200A>G.G89D |             |                 | n basal cell |                  |                       |        | R4.C11.T1R4       | 0.01,0.99,0.0 | 0.921,0.0   | 0.987,0.0   | 1.00,1.00,0.0 |
| STAG2        | 20         | 39742014  | A          | T          | Missense_Mutation      | STAG2.NM_006003:exon29:c.A322T>T.K1074 |             |                 | elanoma.Ev   | TSG              | High Confidence Drive | 2.20%  | R4.C11.T1R4       | 0.1,0.0       | 0.99,0.0    | 1.0         | 1.1,0.0       |
| TOP1         | 20         | 39742014  | A          | T          | Missense_Mutation      | TOP1.NM_003286:exon15:c.A437T>G.A48V   |             |                 | AML*         |                  |                       |        | R4.C11.T1R4       | 0.1,0.0       | 0.99,0.0    | 1.0         | 1.1,0.0       |
| DST          | 6          | 56505297  | C          | T          | Missense_Mutation      | DSTFM_017723:exon4:c.G32A>G.G178R      |             |                 | AML*         |                  |                       |        | R4.C11.T1R4       | 0.58,0.42,1.0 | 1.0         | 1.0         | 0.83,0.83,3.0 |
| EGFR         | 7          | 5525915   | T          | G          | Missense_Mutation      | EGFR.NM_005228:exon21:c.1257G>G.L858R  | rs121434568 | COSM224a.NSCLCN |              | OncoGene         | High Confidence Drive | 4.60%  | R4.C11.T1R4       | 0.1,0.0       | 0.99,0.0    | 1.0         | 1.00,1.00,0.0 |
| SPEG         | 2          | 220209843 | A          | T          | Missense_Mutation      | SPEG.NM_005878:exon3:c.G175A>A.A297    |             |                 | OSM140561    |                  |                       |        | R4.C11.T1R4       | 0.21,0.79,1.0 | 0.011,0.0   | 0.166,0.0   | 1.1,0.0       |
| RECQL4       | 8          | 145738379 | C          | T          | Missense_Mutation      | RECQL4.NM_004200:exon16:c.G200A>G.G89D |             |                 | n basal cell |                  |                       |        | R4.C11.T1R4       | 0.01,0.99,0.0 | 0.921,0.0   | 0.987,0.0   | 1.00,1.00,0.0 |
| STAG2        | 20         | 39742014  | A          | T          | Missense_Mutation      | STAG2.NM_006003:exon29:c.A322T>T.K1074 |             |                 | elanoma.Ev   | TSG              | High Confidence Drive | 2.20%  | R4.C11.T1R4       | 0.1,0.0       | 0.99,0.0    | 1.0         | 1.1,0.0       |
| TOP1         | 20         | 39742014  | A          | T          | Missense_Mutation      | TOP1.NM_003286:exon15:c.A437T>G.A48V   |             |                 | AML*         |                  |                       |        | R4.C11.T1R4       | 0.1,0.0       | 0.99,0.0    | 1.0         | 1.1,0.0       |
| DST          | 6          | 56505297  | C          | T          | Missense_Mutation      | DSTFM_017723:exon4:c.G32A>G.G178R      |             |                 | AML*         |                  |                       |        | R4.C11.T1R4       | 0.58,0.42,1.0 | 1.0         | 1.0         | 0.83,0.83,3.0 |
| EGFR         | 7          | 5525915   | T          | G          | Missense_Mutation      | EGFR.NM_005228:exon21:c.1257G>G.L858R  | rs121434568 | COSM224a.NSCLCN |              | OncoGene         | High Confidence Drive | 4.60%  | R4.C11.T1R4       | 0.1,0.0       | 0.99,0.0    | 1.0         | 1.00,1.00,0.0 |
| SPEG         | 2          | 220209843 | A          | T          | Missense_Mutation      | SPEG.NM_005878:exon3:c.G175A>A.A297    |             |                 | OSM140561    |                  |                       |        | R4.C11.T1R4       | 0.21,0.79,1.0 | 0.011,0.0   | 0.166,0.0   | 1.1,0.0       |
| RECQL4       | 8          | 145738379 | C          | T          | Missense_Mutation      | RECQL4.NM_004200:exon16:c.G200A>G.G89D |             |                 | n basal cell |                  |                       |        | R4.C11.T1R4       | 0.01,0.99,0.0 | 0.921,0.0   | 0.987,0.0   | 1.00,1.00,0.0 |
| STAG2        | 20         | 39742014  | A          | T          | Missense_Mutation      | STAG2.NM_006003:exon29:c.A322T>T.K1074 |             |                 | elanoma.Ev   | TSG              | High Confidence Drive | 2.20%  | R4.C11.T1R4       | 0.1,0.0       | 0.99,0.0    | 1.0         | 1.1,0.0       |
| TOP1         | 20         | 39742014  | A          | T          | Missense_Mutation      | TOP1.NM_003286:exon15:c.A437T>G.A48V   |             |                 | AML*         |                  |                       |        | R4.C11.T1R4       | 0.1,0.0       | 0.99,0.0    | 1.0         | 1.1,0.0       |
| DST          | 6          | 56505297  | C          | T          | Missense_Mutation      | DSTFM_017723:exon4:c.G32A>G.G178R      |             |                 | AML*         |                  |                       |        | R4.C11.T1R4       | 0.58,0.42,1.0 | 1.0         | 1.0         | 0.83,0.83,3.0 |
| EGFR         | 7          | 5525915   | T          | G          | Missense_Mutation      | EGFR.NM_005228:exon21:c.1257G>G.L858R  | rs121434568 | COSM224a.NSCLCN |              | OncoGene         | High Confidence Drive | 4.60%  | R4.C11.T1R4       | 0.1,0.0       | 0.99,0.0    | 1.0         | 1.00,1.00,0.0 |
| SPEG         | 2          | 220209843 | A          | T          | Missense_Mutation      | SPEG.NM_005878:exon3:c.G175A>A.A297    |             |                 | OSM140561    |                  |                       |        | R4.C11.T1R4       | 0.21,0.79,1.0 | 0.011,0.0   | 0.166,0.0   | 1.1,0.0       |
| RECQL4       | 8          | 145738379 | C          | T          | Missense_Mutation      | RECQL4.NM_004200:exon16:c.G200A>G.G89D |             |                 | n basal cell |                  |                       |        | R4.C11.T1R4       | 0.01,0.99,0.0 | 0.921,0.0   | 0.987,0.0   | 1.00,1.00,0.0 |
| STAG2        | 20         | 39742014  | A          | T          | Missense_Mutation      | STAG2.NM_006003:exon29:c.A322T>T.K1074 |             |                 | elanoma.Ev   | TSG              | High Confidence Drive | 2.20%  | R4.C11.T1R4       | 0.1,0.0       | 0.99,0.0    | 1.0         | 1.1,0.0       |
| TOP1         | 20         | 39742014  | A          | T          | Missense_Mutation      | TOP1.NM_003286:exon15:c.A437T>G.A48V   |             |                 | AML*         |                  |                       |        | R4.C11.T1R4       | 0.1,0.0       | 0.99,0.0    | 1.0         | 1.1,0.0       |
| DST          | 6          | 56505297  | C          | T          | Missense_Mutation      | DSTFM_017723:exon4:c.G32A>G.G178R      |             |                 | AML*         |                  |                       |        | R4.C11.T1R4       | 0.58,0.42,1.0 | 1.0         | 1.0         | 0.83,0.83,3.0 |
| EGFR         | 7          | 5525915   | T          | G          | Missense_Mutation      | EGFR.NM_005228:exon21:c.1257G>G.L858R  | rs121434568 | COSM224a.NSCLCN |              | OncoGene         | High Confidence Drive | 4.60%  | R4.C11.T1R4       | 0.1,0.0       | 0.99,0.0    | 1.0         | 1.00,1.00,0.0 |
| SPEG         | 2          | 220209843 | A          | T          | Missense_Mutation      | SPEG.NM_005878:exon3:c.G175A>A.A297    |             |                 | OSM140561    |                  |                       |        | R4.C11.T1R4       | 0.21,0.79,1.0 | 0.011,0.0   | 0.166,0.0   | 1.1,0.0       |
| RECQL4       | 8          | 145738379 | C          | T          | Missense_Mutation      | RECQL4.NM_004200:exon16:c.G200A>G.G89D |             |                 | n basal cell |                  |                       |        | R4.C11.T1R4       | 0.01,0.99,0.0 | 0.921,0.0   | 0.987,0.0   | 1.00,1.00,0.0 |
| STAG2        | 20         | 39742014  | A          | T          | Missense_Mutation      | STAG2.NM_006003:exon29:c.A322T>T.K1074 |             |                 | elanoma.Ev   | TSG              | High Confidence Drive | 2.20%  | R4.C11.T1R4       | 0.1,0.0       | 0.99,0.0    | 1.0         | 1.1,0.0       |
| TOP1         | 20         | 39742014  | A          | T          | Missense_Mutation      | TOP1.NM_003286:exon15:c.A437T>G.A48V   |             |                 | AML*         |                  |                       |        | R4.C11.T1R4       | 0.1,0.0       | 0.99,0.0    | 1.0         | 1.1,0.0       |
| DST          | 6          | 56505297  | C          | T          | Missense_Mutation      | DSTFM_017723:exon4:c.G32A>G.G178R      |             |                 | AML*         |                  |                       |        | R4.C11.T1R4       | 0.58,0.42,1.0 | 1.0         | 1.0         | 0.83,0.83,3.0 |
| EGFR         | 7          | 5525915   |            |            |                        |                                        |             |                 |              |                  |                       |        |                   |               |             |             |               |

**Supplementary Table 3: Driver mutation prevalence in lung cancer samples**

| Driver genes | Prevalence in pan-lung cancer of TCGA (n=1144 samples) | Prevalence in LUAC of TCGA (n=230 samples) | Mutations identified in this study | Mutated tumors               | Mutations functionally implicated in lung tumorigenesis |
|--------------|--------------------------------------------------------|--------------------------------------------|------------------------------------|------------------------------|---------------------------------------------------------|
| KRAS         | 23.0%                                                  | 36.0%                                      | G12C; G12D                         | RJLC2-T2; RJLC3-T3           | Yes                                                     |
| EGFR         | 14.0%                                                  | 17.0%                                      | L858R; E746-A750 deletion          | RJLC1-T1; RJLC1-T2; RJLC4-T1 | Yes                                                     |
| ERBB2        | 4.0%                                                   | 5.0%                                       | Y772-A775 duplication              | RJLC4-T2; RJLC4-T3           | Yes                                                     |
| MET          | 5.0%                                                   | 12.0%                                      | Exon 14 splice site                | RJLC2-T3                     | Yes                                                     |
| ARAF         | 2.7%                                                   | 2.6%                                       | S214C                              | RJLC3-T2                     | Yes                                                     |
| BRAF         | 7.0%                                                   | 11.0%                                      | D594G                              | RJLC2-T1                     | No                                                      |
| MAP2K1       | 1.7%                                                   | 1.7%                                       | E102-I103 deletion                 | RJLC3-T1                     | No                                                      |

**Supplementary Table 4: Neoantigen repertoires predicted by NetMHCpan algorithm**

| Sample  | MutatedGene | Mutation information                 | Chr | Position  | ref | alt | T_val | T(DV/DN)    | N(DV/DN)    | HLA         | wildPeptide  | Neoantigens  | wildPeptide-Aff(nM) | Neoantigens-Aff(nM) |
|---------|-------------|--------------------------------------|-----|-----------|-----|-----|-------|-------------|-------------|-------------|--------------|--------------|---------------------|---------------------|
| RJLC1-1 | NBPF10      | NM_01039703:exon6:c.7836G>A.L279W    | 1   | 145299787 | G   | A   | 0.12  | 3.22        | 0.17        | HLA-A*11:01 | SAGPLSSEK    | SAGPWSSEK    | 135.7               | 73.8                |
| RJLC1-1 | SPEG        | NM_005876:exon3:c.G775A>p.A259T      | 2   | 220309843 | T   | G   | 0.171 | 0.855555556 | 0.084027778 | HLA-A*11:01 | SAFSLYRGR    | STFSLYRGR    | 309.5               | 42.5                |
| RJLC1-1 | PRR21       | NM_01080835:exon1:c.C847T.p.P283S    | 2   | 240981553 | G   | A   | 0.167 | 3.15        | 1.21        | HLA-A*11:01 | GPSSMPLHPR   | GPSSMPLHPR   | 134.5               | 76.5                |
| RJLC1-1 | PK2         | NM_138733:exon1:c.A676T.p.M227L      | 6   | 49754222  | T   | A   | 0.08  | 26.300      | 0.157638889 | HLA-A*11:01 | OLIKMLDK     | OLIKMLDK     | 1123.5              | 27                  |
| RJLC1-1 | RSFH3       | NM_031924:exon6:c.C1273A>p.P425I     | 6   | 158401816 | G   | T   | 0.118 | 0.984027778 | 0.088888889 | HLA-A*11:01 | SGYFYDPIR    | SGYFYDPIR    | 556.2               | 313.4               |
| RJLC1-1 | RECQ4       | NM_004260:exon16:c.G2606A>p.G869D    | 8   | 145738379 | C   | T   | 0.175 | 37.14       | 0.122222222 | HLA-A*11:01 | AVGGERVPVK   | AVGGERVPVK   | 135.2               | 90.8                |
| RJLC1-1 | SERPIN5     | NM_00624:exon3:c.C452T.p.T151M       | 14  | 95054151  | C   | T   | 0.151 | 50.281      | 0.289583333 | HLA-A*11:01 | FVFSAMKTYL   | FVFSAMKTYL   | 1622.6              | 249.1               |
| RJLC1-1 | SERPIN5     | NM_00624:exon3:c.C452T.p.T151M       | 14  | 95054151  | C   | T   | 0.151 | 50.281      | 0.289583333 | HLA-A*11:01 | FVFSAMKTYL   | FVFSAMKTYL   | 1495                | 275.2               |
| RJLC1-1 | PLA2G4D     | NM_178034:exon3:c.G160A>p.A54T       | 15  | 42379593  | C   | T   | 0.036 | 0.6         | 0.154861111 | HLA-A*11:01 | LQLSTAPGMK   | LQLSTAPGMK   | 402.1               | 354.6               |
| RJLC1-1 | PLA2G4D     | NM_178034:exon3:c.G160A>p.A54T       | 15  | 42379593  | C   | T   | 0.036 | 0.6         | 0.154861111 | HLA-A*11:01 | TAPGMKFKTK   | TAPGMKFKTK   | 1452.9              | 244                 |
| RJLC1-1 | TOP1        | NM_003286:exon15:c.C1457T.p.A486V    | 20  | 39742614  | C   | T   | 0.118 | 0.65625     | 0.051388889 | HLA-A*11:01 | KLALRAGNEK   | KLVRAGNEK    | 326.3               | 251.8               |
| RJLC1-1 | TOP1        | NM_003286:exon15:c.C1457T.p.A486V    | 20  | 39742614  | C   | T   | 0.118 | 0.65625     | 0.051388889 | HLA-A*11:01 | LALRAGNEK    | LVLRAGNEK    | 453                 | 101.2               |
| RJLC1-1 | CHM         | NM_000390:exon13:c.G1570C.p.V524L    | X   | 85134009  | C   | G   | 0.064 | 0.311111111 | 0.045138889 | HLA-A*11:01 | SVVQKLFVPY   | SVLQKLFVPY   | 97.4                | 88.7                |
| RJLC1-1 | STAG2       | NM_006603:exon29:c.A3221T.p.K1074I   | X   | 123220564 | A   | T   | 0.156 | 35.189      | 0.113944444 | HLA-A*11:01 | SKKSPKSTGK   | SKKSPKSTGK   | 2400.8              | 112                 |
| RJLC1-1 | STAG2       | NM_006603:exon29:c.A3221T.p.K1074I   | X   | 123220564 | A   | T   | 0.156 | 35.189      | 0.113944444 | HLA-A*11:01 | SKKSPKSTGK   | SKKSPKSTGK   | 18407.8             | 118.9               |
| RJLC1-1 | STAG2       | NM_006603:exon29:c.A3221T.p.K1074I   | X   | 123220564 | A   | T   | 0.156 | 35.189      | 0.113944444 | HLA-A*11:01 | STVRSKSKK    | STVRSKSKK    | 239.6               | 18.3                |
| RJLC1-1 | STAG2       | NM_006603:exon29:c.A3221T.p.K1074I   | X   | 123220564 | A   | T   | 0.156 | 35.189      | 0.113944444 | HLA-A*11:01 | SKKSPKSTGK   | SKKSPKSTGK   | 11479.2             | 44.9                |
| RJLC1-1 | CYBRD1      | NM_01256909:exon4:c.C413T.p.P138L    | 2   | 172411063 | C   | T   | 0.032 | 0.438888889 | 0.129166667 | HLA-B*40:01 | AYSTFFLEGVGF | AYSTFFLEGVGF | 891                 | 380.5               |
| RJLC1-1 | SERPIN5     | NM_00624:exon3:c.C452T.p.T151M       | 14  | 95054151  | C   | T   | 0.151 | 50.281      | 0.289583333 | HLA-A*11:01 | KMLYLADTF    | KMLYLADTF    | 1044.4              | 147.1               |
| RJLC1-1 | RALGAP2     | NM_020343:exon10:c.G1222T.p.V408L    | 20  | 20610018  | C   | A   | 0.043 | 0.343055556 | 0.063194444 | HLA-A*11:01 | RGYVNFNEV    | RGYVNFNEV    | 383.8               | 180.3               |
| RJLC1-1 | RALGAP2     | NM_020343:exon10:c.G1222T.p.V408L    | 20  | 20610018  | C   | A   | 0.043 | 0.343055556 | 0.063194444 | HLA-A*11:01 | RGYVNFNEV    | RGYVNFNEV    | 78.7                | 36.7                |
| RJLC1-1 | RALGAP2     | NM_020343:exon10:c.G1222T.p.V408L    | 20  | 20610018  | C   | A   | 0.043 | 0.343055556 | 0.063194444 | HLA-A*11:01 | RGYVNFNEV    | RGYVNFNEV    | 667.6               | 342.8               |
| RJLC1-1 | CYBRD1      | NM_01256909:exon4:c.C413T.p.P138L    | 2   | 172411063 | C   | T   | 0.032 | 0.438888889 | 0.129166667 | HLA-B*40:01 | PEGVFNVL     | LEGVFNVL     | 1314.5              | 32.8                |
| RJLC1-1 | WNT9B       | NM_003396:exon3:c.C446T.p.P149L      | 17  | 44952578  | C   | T   | 0.038 | 0.652777778 | 0.185416667 | HLA-B*40:01 | MERCCTDDSP   | MERCCTDDSL   | 19257.5             | 155.1               |
| RJLC1-1 | CHM         | NM_000390:exon13:c.G1570C.p.V524L    | X   | 85134009  | C   | G   | 0.064 | 0.311111111 | 0.045138889 | HLA-A*11:01 | REDESIV      | REDESIV      | 1546.7              | 284.2               |
| RJLC1-1 | EPMZAI1P    | NM_014805:exon3:c.C1024T.p.L342F     | 3   | 37033545  | G   | A   | 0.184 | 99.438      | 0.311805556 | HLA-C*07:02 | LRRGKTLK     | FRRGKTLK     | 158                 | 31                  |
| RJLC1-1 | NBPF10      | NM_01039703:exon6:c.7836G>A.L279W    | 1   | 145299787 | T   | G   | 0.19  | 0.784722222 | 0.101805556 | HLA-A*11:01 | SAGPLSSEK    | SAGPWSSEK    | 135.7               | 73.8                |
| RJLC1-1 | TAF1B       | NM_005680:exon13:c.C1317A>p.D439E    | 2   | 10059215  | C   | A   | 0.036 | 0.6         | 0.203472222 | HLA-A*11:01 | KPLYSFVDK    | KPLYSFVDK    | 232.4               | 22.5                |
| RJLC1-1 | TAF1B       | NM_005680:exon13:c.C1317A>p.D439E    | 2   | 10059215  | C   | A   | 0.036 | 0.6         | 0.203472222 | HLA-A*11:01 | KPLYSFVDK    | KPLYSFVDK    | 764.6               | 76.7                |
| RJLC1-1 | MANEA       | NM_024641:exon5:c.G1283T.p.R428L     | 6   | 96054175  | G   | T   | 0.034 | 0.733333333 | 0.214583333 | HLA-A*11:01 | NTVYLDYRPHK  | NTVYLDYRPHK  | 1243.7              | 300.6               |
| RJLC1-1 | MANEA       | NM_024641:exon5:c.G1283T.p.R428L     | 6   | 96054175  | G   | T   | 0.034 | 0.733333333 | 0.214583333 | HLA-A*11:01 | NTVYLDYRPHK  | NTVYLDYRPHK  | 63.8                | 19.4                |
| RJLC1-1 | ERCC6L2     | NM_01010895:exon6:c.G1099T.p.A367S   | 9   | 98678624  | G   | T   | 0.079 | 0.397916667 | 0.063888889 | HLA-A*11:01 | RKAMQRLAKK   | RKAMQRLAKK   | 121.6               | 53.1                |
| RJLC1-1 | ERCC6L2     | NM_01010895:exon6:c.G1099T.p.A367S   | 9   | 98678624  | G   | T   | 0.079 | 0.397916667 | 0.063888889 | HLA-A*11:01 | ATGRKSMQR    | ATGRKSMQR    | 266.2               | 217.4               |
| RJLC1-1 | ERCC6L2     | NM_01010895:exon6:c.G1099T.p.A367S   | 9   | 98678624  | G   | T   | 0.079 | 0.397916667 | 0.063888889 | HLA-A*11:01 | KVAFRKAARK   | KVAFRKAARK   | 29.5                | 14                  |
| RJLC1-1 | TF1         | NM_032225:exon2:c.C140T.p.T47M       | 21  | 43783462  | A   | G   | 0.091 | 0.486111111 | 0.077083333 | HLA-A*11:01 | GYPISQCAK    | GYPISQCAK    | 187.9               | 30.4                |
| RJLC1-1 | F9          | NM_000133:exon8:c.G1012C.p.D338H     | X   | 138643856 | C   | G   | 0.03  | 0.966666667 | 0.333333333 | HLA-A*11:01 | VTPICADK     | VTPICIAHK    | 137                 | 92                  |
| RJLC1-1 | F9          | NM_000133:exon8:c.G1012C.p.D338H     | X   | 138643856 | C   | G   | 0.03  | 0.966666667 | 0.333333333 | HLA-A*11:01 | VTPICADK     | VTPICIAHK    | 410.7               | 179.6               |
| RJLC1-1 | DGAT2       | NM_010253891:exon2:c.T143G>p.L48R    | 11  | 75501254  | T   | G   | 0.106 | 0.332638889 | 0.044444444 | HLA-A*11:01 | LMYIFCTDCW   | LMYIFCTDCW   | 226.1               | 83.2                |
| RJLC1-1 | SLC9A7      | NM_001257291:exon15:c.G1790T.p.W597L | X   | 46480445  | C   | A   | 0.038 | 0.413888889 | 0.139583333 | HLA-A*11:01 | WIFRLWYSF    | LIFRLWYSF    | 424.4               | 208.6               |
| RJLC1-1 | F9          | NM_000133:exon8:c.G1012C.p.D338H     | X   | 138643856 | C   | G   | 0.03  | 0.966666667 | 0.333333333 | HLA-A*11:01 | DEKYNIFLKF   | DEKYNIFLKF   | 550.5               | 256.5               |
| RJLC1-1 | ADD3        | NM_001121:exon2:c.A119C.p.N40S       | 10  | 111860530 | A   | G   | 0.046 | 0.504861111 | 0.11875     | HLA-B*40:01 | RERNMSPLD    | RERNMSPLD    | 196.6               | 138.1               |
| RJLC1-1 | SLC9A7      | NM_001257291:exon15:c.G1790T.p.W597L | X   | 46480445  | C   | A   | 0.038 | 0.413888889 | 0.139583333 | HLA-A*11:01 | KQESAWIFRL   | KQESAWIFRL   | 506.2               | 314.5               |
| RJLC1-1 | SLC9A7      | NM_001257291:exon15:c.G1790T.p.W597L | X   | 46480445  | C   | A   | 0.038 | 0.413888889 | 0.139583333 | HLA-A*11:01 | QESAWIFRL    | QESAWIFRL    | 91.4                | 21.9                |
| RJLC1-1 | KIF26B      | NM_018012:exon10:c.G2107C.p.G703R    | 1   | 245809431 | C   | G   | 0.101 | 0.430555556 | 0.069444444 | HLA-C*07:02 | GRRSLHLI     | GRRSLHLI     | 3981.9              | 419.2               |
| RJLC1-1 | DLK1        | NM_003836:exon5:c.G779A.p.S260N      | 14  | 101200860 | A   | C   | 0.032 | 0.377083333 | 0.138888889 | HLA-C*07:02 | TRLPSGYL     | TRLPSGYL     | 3732.6              | 420.6               |
| RJLC1-1 | BRAF        | NM_004333:exon15:c.A1781G.p.D594G    | 7   | 140453154 | T   | C   | 0.075 | 0.301388889 | 0.065277778 | HLA-A*11:01 | GDFGLATVK    | GDFGLATVK    | 7382.2              | 396.7               |
| RJLC1-1 | CSMD3       | NM_052900:exon3:c.G481T.p.V161F      | 8   | 114290854 | C   | A   | 0.219 | 61.217      | 0.147222222 | HLA-A*11:01 | SDFVSAHGFK   | SDFVSAHGFK   | 1022.9              | 272.7               |
| RJLC1-1 | CSMD3       | NM_052900:exon3:c.G481T.p.V161F      | 8   | 114290854 | C   | A   | 0.219 | 61.217      | 0.147222222 | HLA-A*11:01 | DFVSAHGFK    | DFVSAHGFK    | 1152                | 290                 |
| RJLC1-1 | CSMD3       | NM_052900:exon3:c.G481T.p.V161F      | 8   | 114290854 | C   | A   | 0.219 | 61.217      | 0.147222222 | HLA-A*11:01 | FVSAHGFK     | FVSAHGFK     | 112                 | 28.7                |
| RJLC1-1 | F7          | NM_01267554:exon6:c.G871T.p.R291W    | 13  | 117373044 | C   | T   | 0.127 | 59.199      | 0.193055556 | HLA-A*11:01 | MTQDCLQOSRK  | MTQDCLQOSWK  | 680.1               | 340.9               |
| RJLC1-1 | RYR1        | NM_01042723:exon9:c.A1286S>p.T4289A  | 19  | 39055854  | A   | G   | 0.286 | 0.173611111 | 0.008333333 | HLA-A*11:01 | ATAAGATAR    | ATAAGATAR    | 184.8               | 184.6               |
| RJLC1-1 | SLC5A1      | NM_001256314:exon7:c.G310A>p.A104T   | 22  | 32480452  | A   | G   | 0.106 | 25.211      | 0.180555556 | HLA-A*11:01 | EVGGYDAFMEK  | EVGGYDAFMEK  | 512.8               | 298.3               |
| RJLC1-1 | SLC5A1      | NM_001256314:exon7:c.G310A>p.A104T   | 22  | 32480452  | A   | G   | 0.106 | 25.211      | 0.180555556 | HLA-A*11:01 | YDAFMEKYMK   | YDAFMEKYMK   | 1500                | 266.1               |
| RJLC1-1 | SLC5A1      | NM_001256314:exon7:c.G310A>p.A104T   | 22  | 32480452  | A   | G   | 0.106 | 25.211      | 0.180555556 | HLA-A*11:01 | VGVDYDAFMEK  | VGVDYDAFMEK  | 221.7               | 202.2               |
| RJLC1-1 | SLC5A1      | NM_001256314:exon7:c.G310A>p.A104T   | 22  | 32480452  | A   | G   | 0.106 | 25.211      | 0.180555556 | HLA-A*11:01 | YDAFMEKYMK   | YDAFMEKYMK   | 166.8               | 43.2                |
| RJLC1-1 | SLC5A1      | NM_001256314:exon7:c.G310A>p.A104T   | 22  | 32480452  | A   | G   | 0.106 | 25.211      | 0.180555556 | HLA-A*11:01 | DAFMEKYMK    | DFMEKYMK     | 2400.8              | 398.1               |
| RJLC1-1 | IL13RA2     | NM_000640:exon9:c.C1090T.p.R364C     | X   | 114239786 | A   | G   | 0.12  | 65.4861111  | 0.08125     | HLA-A*11:01 | LLRKPNTYK    | LLRKPNTYK    | 326.5               | 286.4               |
| RJLC1-1 | IL13RA2     | NM_000640:exon9:c.C1090T.p.R364C     | X   | 114239786 | A   | G   | 0.12  | 65.4861111  | 0.08125     | HLA-A*11:01 | LLRKPNTYK    | LLRKPNTYK    | 210.9               | 72.5                |
| RJLC1-1 | CSMD3       | NM_052900:exon3:c.G481T.p.V161F      | 8   | 114290854 | C   | A   | 0.219 | 61.217      | 0.147222222 | HLA-B*15:02 | SDFVSAHGFK   | SDFVSAHGFK   | 763.2               | 60.8                |
| RJLC1-1 | CSMD3       | NM_052900:exon3:c.G481T.p.V161F      | 8   | 114290854 | C   | A   | 0.219 | 61.217      | 0.147222222 | HLA-B*15:02 | FVSAHGFKVY   | FVSAHGFKVY   | 271                 | 135.8               |
| RJLC1-1 | CSMD3       | NM_052900:exon3:c.G481T.p.V161F      | 8   | 114290854 | C   | A   | 0.219 | 61.217      | 0.147222222 | HLA-B*15:02 | SLRLTDFVAF   | SLRLTDFVAF   | 11626.4             | 116.6               |
| RJLC1-1 | CSMD3       | NM_052900:exon3:c.G481T.p.V161F      | 8   | 114290854 | C   | A   | 0.219 | 61.217      | 0.147222222 | HLA-B*15:02 | VSAHGFKVY    | VSAHGFKVY    | 776.1               | 190.9               |
| RJLC1-1 | CSMD3       | NM_052900:exon3:c.G481T.p.V161F      | 8   | 114290854 | C   | A   | 0.219 | 61.217      | 0.147222222 | HLA-B*      |              |              |                     |                     |

|          |         |                                      |    |           |   |   |       |             |             |             |             |             |           |        |       |
|----------|---------|--------------------------------------|----|-----------|---|---|-------|-------------|-------------|-------------|-------------|-------------|-----------|--------|-------|
| RJLC2-T3 | DPY19L2 | NM_173812:exon5:c.T610C;p.C204R      | 12 | 64041124  | A | G | 0.053 | 0.215972222 |             | 0-59        | HLA-C*14:02 | CTFMGIMNL   | RTFMGIMNL | 1170.1 | 350.4 |
| RJLC3-T1 | LRR0C6  | NM_001024611:exon1:c.A355G;p.N119D   | 4  | 52883425  | T | C | 0.156 | 25.135      | 0.159027778 | HLA-A*02:01 | LNLSNAIHL   | LNLSNAIHL   | 1655.2    | 433.7  |       |
| RJLC3-T1 | VPS13B  | NM_017890:exon4:c.G8148T;p.Q2716H    | 8  | 100821734 | G | T | 0.041 | 0.077508333 | 0.201388889 | HLA-A*02:01 | SLIIVQVQL   | SLIIVQVQL   | 392.5     | 103.3  |       |
| RJLC3-T1 | MROH6   | NM_001100878:exon3:c.C583G;p.R195G   | 8  | 144653856 | G | C | 0.062 | 0.3125      | 0.065277778 | HLA-A*02:01 | LPLRSLPADRV | LPLRSLPADRV | 884.9     | 30.2   |       |
| RJLC3-T1 | MROH6   | NM_001100878:exon3:c.C583G;p.R195G   | 8  | 144653856 | G | C | 0.062 | 0.3125      | 0.065277778 | HLA-A*02:01 | CALLPRSLPA  | CALLPRSLPA  | 529.9     | 379.4  |       |
| RJLC3-T1 | MROH6   | NM_001100878:exon3:c.C583G;p.R195G   | 8  | 144653856 | G | C | 0.062 | 0.3125      | 0.065277778 | HLA-A*02:01 | ALLPRSLPA   | ALLPRSLPA   | 92.1      | 51.1   |       |
| RJLC3-T1 | GOLGA2  | NM_004486:exon19:c.G1939A;p.V647M    | 9  | 131021523 | C | T | 0.226 | 14.48       | 0.047222222 | HLA-A*02:01 | LQITQLVDQL  | LQITQLVDQL  | 539.3     | 493.7  |       |
| RJLC3-T1 | OR10G4  | NM_001004462:exon1:c.G319A;p.G107R   | 11 | 123886600 | G | A | 0.048 | 0.777777778 | 0.292361111 | HLA-A*02:01 | GSTECFLYTV  | GSTECFLYTV  | 571.3     | 431.3  |       |
| RJLC3-T1 | TRAPP1  | NM_0012120:exon4:c.C395G;p.S132C     | 17 | 7833967   | G | C | 0.13  | 0.972916667 | 0.115277778 | HLA-B*27:05 | RLDSYVRS    | RLDSYVRS    | 104.1     | 66.7   |       |
| RJLC3-T1 | PAGE2   | NM_207339:exon4:c.C286G;p.P96A       | X  | 55117857  | C | G | 0.029 | 0.456944444 | 0.243055556 | HLA-A*02:01 | GIMPTFDLTKV | GIMPTFDLTKV | 798.4     | 314.8  |       |
| RJLC3-T1 | PAGE2   | NM_207339:exon4:c.C286G;p.P96A       | X  | 55117857  | C | G | 0.029 | 0.456944444 | 0.243055556 | HLA-A*02:01 | IMPTFDLTKV  | IMPTFDLTKV  | 1678.2    | 448.4  |       |
| RJLC3-T1 | PAGE2   | NM_207339:exon4:c.C286G;p.P96A       | X  | 55117857  | C | G | 0.029 | 0.456944444 | 0.243055556 | HLA-A*02:01 | IMPTFDLTKV  | IMPTFDLTKV  | 88.8      | 18.9   |       |
| RJLC3-T1 | GLR4    | NM_001024452:exon7:c.C757T;p.R253W   | X  | 102974161 | G | A | 0.154 | 26.143      | 0.136805556 | HLA-A*02:01 | HLERQMYYL   | HLERQMYYL   | 1389.5    | 51.8   |       |
| RJLC3-T1 | GLR4    | NM_001024452:exon7:c.C757T;p.R253W   | X  | 102974161 | G | A | 0.154 | 26.143      | 0.136805556 | HLA-A*02:01 | RMQGYLIQM   | RMQGYLIQM   | 208.3     | 144.8  |       |
| RJLC3-T1 | GLR4    | NM_001024452:exon7:c.C757T;p.R253W   | X  | 102974161 | G | A | 0.154 | 26.143      | 0.136805556 | HLA-A*02:01 | RMQGYLI     | RMQGYLI     | 1163.1    | 393.9  |       |
| RJLC3-T1 | ZRANB2  | NM_005455:exon1:c.A332C;p.D12A       | 1  | 71546644  | T | G | 0.134 | 32.207      | 0.229166667 | HLA-A*11:01 | GDWICPKDK   | GDWICPKDK   | 16072.8   | 219.8  |       |
| RJLC3-T1 | PITX1   | NM_002653:exon2:c.A332C;p.N111S      | 5  | 134367036 | T | G | 0.202 | 65.256      | 0.200694444 | HLA-A*11:01 | RNRYPDMSMR  | RNRYPDMSMR  | 6817.8    | 309.3  |       |
| RJLC3-T1 | TNIP1   | NM_001252386:exon13:c.C1348G;p.L450V | 5  | 150415157 | G | C | 0.134 | 26.168      | 0.111111111 | HLA-A*11:01 | TLNSAQLKAFK | TLNSAQLKAFK | 108.2     | 91.2   |       |
| RJLC3-T1 | TNIP1   | NM_001252386:exon13:c.C1348G;p.L450V | 5  | 150415157 | G | C | 0.134 | 26.168      | 0.111111111 | HLA-A*11:01 | LSNAQLKAFK  | LSNAQLKAFK  | 46.9      | 38.8   |       |
| RJLC3-T1 | WNK2    | NM_0069648:exon25:c.C6137A;p.T2046K  | 9  | 96062354  | C | A | 0.045 | 0.45        | 0.029166667 | HLA-A*11:01 | GGQWTVYHPT  | GGQWTVYHPT  | 31424     | 128.4  |       |
| RJLC3-T1 | WNK2    | NM_0069648:exon25:c.C6137A;p.T2046K  | 9  | 96062354  | C | A | 0.045 | 0.45        | 0.029166667 | HLA-A*11:01 | GGWTVYHPT   | GGWTVYHPT   | 33924.4   | 238.2  |       |
| RJLC3-T1 | OR10G4  | NM_001004462:exon1:c.G319A;p.G107R   | 11 | 123886600 | A | G | 0.048 | 0.777777778 | 0.292361111 | HLA-A*11:01 | QLVFHFLR    | QLVFHFLR    | 17004.4   | 44.2   |       |
| RJLC3-T1 | OR10G4  | NM_001004462:exon1:c.G319A;p.G107R   | 11 | 123886600 | G | A | 0.048 | 0.777777778 | 0.292361111 | HLA-A*11:01 | QLVFHFLG    | QLVFHFLR    | 15706.7   | 42.7   |       |
| RJLC3-T1 | FUT3    | NM_001097641:exon2:c.A1007C;p.D336A  | 19 | 5843844   | T | G | 0.111 | 5.40        | 1.47        | HLA-A*11:01 | SFSWALDFCK  | SFSWALDFCK  | 35.6      | 28.5   |       |
| RJLC3-T1 | FUT3    | NM_001097641:exon2:c.A1007C;p.D336A  | 19 | 5843844   | T | G | 0.111 | 5.40        | 1.47        | HLA-A*11:01 | SFSWALDFCK  | SFSWALDFCK  | 37.6      | 13.5   |       |
| RJLC3-T1 | FUT3    | NM_001097641:exon2:c.A1007C;p.D336A  | 19 | 5843844   | T | G | 0.111 | 5.40        | 1.47        | HLA-A*11:01 | ALDFCKACWK  | ALDFCKACWK  | 146.7     | 64.1   |       |
| RJLC3-T1 | FUT3    | NM_001097641:exon2:c.A1007C;p.D336A  | 19 | 5843844   | T | G | 0.111 | 5.40        | 1.47        | HLA-A*11:01 | SFSWALDF    | SFSWALDF    | 1138.2    | 486.1  |       |
| RJLC3-T1 | FUT3    | NM_001097641:exon2:c.A1007C;p.D336A  | 19 | 5843844   | T | G | 0.111 | 5.40        | 1.47        | HLA-A*11:01 | SFSWALDFCK  | SFSWALDFCK  | 52.7      | 23.7   |       |
| RJLC3-T1 | FUT3    | NM_001097641:exon2:c.A1007C;p.D336A  | 19 | 5843844   | T | G | 0.111 | 5.40        | 1.47        | HLA-A*11:01 | LDFCKACWK   | LDFCKACWK   | 3242.2    | 72.4   |       |
| RJLC3-T1 | PAGE2   | NM_207339:exon4:c.C286G;p.P96A       | X  | 55117857  | C | G | 0.029 | 0.456944444 | 0.243055556 | HLA-A*11:01 | IMPTFDLTK   | IMPTFDLTK   | 93.2      | 17.9   |       |
| RJLC3-T1 | ARMCX2  | NM_014782:exon5:c.G1531A;p.A511T     | X  | 100911044 | C | T | 0.168 | 32.159      | 0.184027778 | HLA-A*11:01 | LVNSINFFR   | LVNSINFFR   | 57.9      | 48.2   |       |
| RJLC3-T1 | RNF17   | NM_001184993:exon3:c.G1234T;p.V412L  | 13 | 25367478  | G | T | 0.172 | 36.173      | 0.225       | HLA-B*13:01 | VESSALVF    | VESSALVF    | 377       | 258.6  |       |
| RJLC3-T1 | PAGE2   | NM_207339:exon4:c.C286G;p.P96A       | X  | 55117857  | C | G | 0.029 | 0.456944444 | 0.243055556 | HLA-B*13:01 | REGIMPTFDL  | REGIMPTFDL  | 799.5     | 490.4  |       |
| RJLC3-T1 | GLR4    | NM_001024452:exon7:c.C757T;p.R253W   | X  | 102974161 | G | A | 0.154 | 26.143      | 0.136805556 | HLA-B*13:01 | LERQMYYLI   | LERQMYYLI   | 832       | 81.0   |       |
| RJLC3-T1 | GLR4    | NM_001024452:exon7:c.C757T;p.R253W   | X  | 102974161 | G | A | 0.154 | 26.143      | 0.136805556 | HLA-B*13:01 | LERQMYYLI   | LERQMYYLI   | 569       | 47.3   |       |
| RJLC3-T1 | VVAAS1  | NM_001039500:exon5:c.G622A;p.A208T   | 1  | 20644081  | G | A | 0.052 | 0.868055556 | 0.214563333 | HLA-B*27:05 | WNKGLATLL   | WNKGLATLL   | 508.2     | 461.4  |       |
| RJLC3-T1 | GARS    | NM_002047:exon13:c.A1697C;p.Y566S    | 7  | 30665933  | A | C | 0.167 | 8.40        | 0.042361111 | HLA-B*27:05 | KRFKQTLVY   | KRFKQTLVY   | 347.6     | 156.2  |       |
| RJLC3-T1 | GARS    | NM_002047:exon13:c.A1697C;p.Y566S    | 7  | 30665933  | A | C | 0.167 | 8.40        | 0.042361111 | HLA-B*27:05 | KRFKQTLVY   | KRFKQTLVY   | 253.9     | 222.9  |       |
| RJLC3-T1 | GARS    | NM_002047:exon13:c.A1697C;p.Y566S    | 7  | 30665933  | A | C | 0.167 | 8.40        | 0.042361111 | HLA-B*27:05 | KRFKQTLVY   | KRFKQTLVY   | 44.1      | 23.4   |       |
| RJLC3-T1 | OR10G4  | NM_001004462:exon1:c.G319A;p.G107R   | 11 | 123886600 | G | A | 0.048 | 0.777777778 | 0.292361111 | HLA-B*27:05 | FLGSTEFLY   | FLRSTECFLY  | 16946     | 366.9  |       |
| RJLC3-T1 | OR10G4  | NM_001004462:exon1:c.G319A;p.G107R   | 11 | 123886600 | G | A | 0.048 | 0.777777778 | 0.292361111 | HLA-B*27:05 | LGSTECFLY   | LGSTECFLY   | 26717.9   | 331.1  |       |
| RJLC3-T1 | TRAPP1  | NM_0012120:exon4:c.C395G;p.S132C     | 17 | 7833967   | G | C | 0.13  | 0.972916667 | 0.115277778 | HLA-B*27:05 | RSRLDSYVRS  | RSRLDSYVRS  | 635.8     | 326.4  |       |
| RJLC3-T1 | TRAPP1  | NM_0012120:exon4:c.C395G;p.S132C     | 17 | 7833967   | G | C | 0.13  | 0.972916667 | 0.115277778 | HLA-B*27:05 | FRSLDSYVR   | FRSLDSYVR   | 146.2     | 139.3  |       |
| RJLC3-T1 | TRAPP1  | NM_0012120:exon4:c.C395G;p.S132C     | 17 | 7833967   | G | C | 0.13  | 0.972916667 | 0.115277778 | HLA-B*27:05 | RSRLDSYVRS  | RSRLDSYVRS  | 870.3     | 397.3  |       |
| RJLC3-T1 | TRAPP1  | NM_0012120:exon4:c.C395G;p.S132C     | 17 | 7833967   | G | C | 0.13  | 0.972916667 | 0.115277778 | HLA-B*27:05 | RSRLDSYVRS  | RSRLDSYVRS  | 45.6      | 26.7   |       |
| RJLC3-T1 | TRAPP1  | NM_0012120:exon4:c.C395G;p.S132C     | 17 | 7833967   | G | C | 0.13  | 0.972916667 | 0.115277778 | HLA-B*27:05 | FRSLDSYV    | FRSLDSYV    | 551.3     | 493.7  |       |
| RJLC3-T1 | FUT3    | NM_001097641:exon2:c.A1007C;p.D336A  | 19 | 5843844   | T | G | 0.111 | 5.40        | 1.47        | HLA-B*27:05 | RPRSFSWALD  | RPRSFSWALD  | 2184      | 279.1  |       |
| RJLC3-T1 | FCRL4   | NM_031282:exon7:c.G1165A;p.A389T     | 1  | 157551405 | C | T | 0.086 | 3.32        | 1.44        | HLA-C*03:04 | AAGATGGLL   | TAGATGGLL   | 561       | 462.6  |       |
| RJLC3-T1 | LRR0C6  | NM_001024611:exon1:c.A355G;p.N119D   | 4  | 52883425  | T | C | 0.156 | 25.135      | 0.159027778 | HLA-C*03:04 | LNLSNAIHL   | LNLSNAIHL   | 33.2      | 26.1   |       |
| RJLC3-T1 | PITX1   | NM_002653:exon2:c.A332C;p.N111S      | 5  | 134367036 | T | G | 0.202 | 65.256      | 0.200694444 | HLA-C*03:04 | RNRYPDMSM   | RNRYPDMSM   | 6887.4    | 312.8  |       |
| RJLC3-T1 | C2CD0A  | NM_207322:exon2:c.C125T;p.T421       | 15 | 62359937  | C | T | 0.149 | 24.137      | 0.131944444 | HLA-C*03:04 | TAACANVTL   | TAACANVTL   | 10969.2   | 276.5  |       |
| RJLC3-T1 | CAS3    | NM_007359:exon7:c.A1779T;p.N300S     | 17 | 38319847  | A | G | 0.073 | 0.353472222 | 0.081944444 | HLA-C*03:04 | RSAACTGRM   | RSAACTGRM   | 6128.7    | 165.6  |       |
| RJLC3-T1 | MUC16   | NM_0024890:exon3:c.C1771T;p.T5924I   | 19 | 9069675   | A | G | 0.105 | 0.713888889 | 0.134027778 | HLA-C*03:04 | TSSPSPVPL   | ISSPSPVPL   | 1299.1    | 430.3  |       |
| RJLC3-T1 | PAGE2   | NM_207339:exon4:c.C286G;p.P96A       | X  | 55117857  | C | G | 0.029 | 0.456944444 | 0.243055556 | HLA-C*03:04 | MPTFDLTKV   | MPTFDLTKV   | 1228.5    | 186.5  |       |
| RJLC3-T1 | PAGE2   | NM_207339:exon4:c.C286G;p.P96A       | X  | 55117857  | C | G | 0.029 | 0.456944444 | 0.243055556 | HLA-C*03:04 | MPTFDLTKV   | MPTFDLTKV   | 3392.7    | 254.7  |       |
| RJLC3-T1 | PAGE2   | NM_207339:exon4:c.C286G;p.P96A       | X  | 55117857  | C | G | 0.029 | 0.456944444 | 0.243055556 | HLA-C*03:04 | PTFDLTKV    | ATFDLTKV    | 5463.4    | 113.2  |       |
| RJLC3-T1 | VVAAS1  | NM_001039500:exon5:c.G622A;p.A208T   | 1  | 20644081  | G | A | 0.052 | 0.868055556 | 0.214563333 | HLA-C*15:02 | LATLNTVE    | LTLTNTVE    | 663       | 335.8  |       |
| RJLC3-T1 | NASP    | NM_001195193:exon8:c.G1658C;p.R553T  | 1  | 46080868  | G | C | 0.186 | 59.258      | 0.207638889 | HLA-A*02:01 | EVENRMAV    | EVIENTMAV   | 1765.3    | 167.0  |       |
| RJLC3-T1 | NASP    | NM_001195193:exon8:c.G1658C;p.R553T  | 1  | 46080868  | G | C | 0.186 | 59.258      | 0.207638889 | HLA-A*02:01 | NRMVNLNEQV  | NRMVNLNEQV  | 1495.6    | 369.3  |       |
| RJLC3-T1 | PIK3CA  | NM_006218:exon8:c.G1357C;p.E453Q     | 3  | 178928079 | G | C | 0.195 | 57.235      | 0.2125      | HLA-A*02:01 | GLEDLNPVIG  | GLEDLNPVIG  | 888.8     | 147.0  |       |
| RJLC3-T1 | PIK3CA  | NM_006218:exon8:c.G1357C;p.E453Q     | 3  | 178928079 | G | C | 0.195 | 57.235      | 0.2125      | HLA-A*02:01 | GLEDLNPVIG  | GLEDLNPVIG  | 1026.7    | 246.4  |       |
| RJLC3-T1 | PIK3CA  | NM_006218:exon8:c.G1357C;p.E453Q     | 3  | 178928079 | G | C | 0.195 | 57.235      | 0.2125      | HLA-A*02:01 | GLEDLNPVIG  | GLEDLNPVIG  | 16812.7   | 489.3  |       |
| RJLC3-T1 | PIK3CA  | NM_006218:exon8:c.G1357C;p.E453Q     | 3  | 178928079 | G | C | 0.195 | 57.235      | 0.2125      | HLA-A*02:01 | GLEDLNPVIG  | GLEDLNPVIG  | 53        | 14.5   |       |
| RJLC3-T1 | SLC9B1  | NM_001100874:exon6:c.A651C;p.L217F   | 4  | 103866352 | T | G | 0.153 | 0.864583333 | 0.088194444 | HLA-A*02:01 | WAFLLGFLVGA | WAFLLGFLVGA | 623.6     | 332.9  |       |
| RJLC3-T1 | SLC9B1  | NM_001100874:exon6:c.A651C;p.L217F   | 4  | 103866352 | T |   |       |             |             |             |             |             |           |        |       |

|          |             |                                      |    |           |   |   |       |             |                         |             |             |         |       |
|----------|-------------|--------------------------------------|----|-----------|---|---|-------|-------------|-------------------------|-------------|-------------|---------|-------|
| RJLC3-T3 | PRAMEF11    | NM_001146344:exon3:c.G683A;p.R228H   | 1  | 12887174  | C | T | 0.061 | 3.46        | 1:41 HLA-A*02:01        | KLRLCLQKLYM | KLHCLQKLYM  | 2109.3  | 383.6 |
| RJLC3-T3 | FBOXA1      | NM_001080410:exon2:c.C1003T;p.R335W  | 2  | 73493713  | G | A | 2.008 | 10.38       | 0.04375 HLA-A*02:01     | FEIELLERA   | FIEELLEWA   | 503.7   | 133.6 |
| RJLC3-T3 | HRH1        | NM_001098211:exon2:c.T446C;p.L149P   | 3  | 11301169  | T | C | 0.125 | 35.244      | 0.217361111 HLA-A*02:01 | ATILGAWFL   | ATIPGAWFL   | 257.7   | 61.5  |
| RJLC3-T3 | CSN1S1      | NM_001025104:exon11:c.C307A;p.L103I  | 4  | 70806707  | C | A | 0.095 | 0.338194444 | 0.58 HLA-A*02:01        | RLNEYNQLQL  | RLNEYNQIQL  | 98.5    | 67.9  |
| RJLC3-T3 | PLEC        | NM_201378:exon25:c.C3200A;p.S1067Y   | 8  | 145003289 | G | T | 0.091 | 4.40        | 0.47 HLA-A*02:01        | SLSAIYLELK  | SLVAIYLELK  | 104.1   | 49.1  |
| RJLC3-T3 | TMEM245     | NM_032012:exon15:c.T2210C;p.V737A    | 9  | 111800311 | A | G | 0.043 | 0.797916667 | 0.272222222 HLA-A*02:01 | TMFGINIVFI  | TMFGINIAFI  | 39.1    | 38.6  |
| RJLC3-T3 | TMEM245     | NM_032012:exon15:c.T2210C;p.V737A    | 9  | 111800311 | A | G | 0.043 | 0.797916667 | 0.272222222 HLA-A*02:01 | GINVIFPSA   | GINVIFPSA   | 1059.6  | 251.7 |
| RJLC3-T3 | TMEM245     | NM_032012:exon15:c.T2210C;p.V737A    | 9  | 111800311 | A | G | 0.043 | 0.797916667 | 0.272222222 HLA-A*02:01 | RMFGINIVF   | RMFGINIVF   | 659.2   | 457.8 |
| RJLC3-T3 | KRAS        | NM_004985:exon2:c.G34T;p.G12C        | 12 | 25398285  | C | A | 0.37  | 74.126      | 0.140277778 HLA-A*11:01 | VVVGAGGVGK  | LVVVGAGGVGK | 392.9   | 203.6 |
| RJLC3-T3 | DCT         | NM_001922:exon8:c.A1498G;p.K500E     | 13 | 95092214  | T | C | 0.08  | 1.041666667 | 0.206944444 HLA-A*02:01 | RLRKYGTPL   | RLREYGTPL   | 1051.2  | 138.6 |
| RJLC3-T3 | ALDH1A3     | NM_000693:exon13:c.G1477A;p.A493T    | 15 | 101454916 | G | A | 0.036 | 0.725       | 0.252777778 HLA-A*11:01 | YLALEYTEVK  | YTLALEYTEV  | 84.9    | 26.7  |
| RJLC3-T3 | MC2R        | NM_000529:exon2:c.T184A;p.F62I       | 18 | 13885334  | A | T | 0.23  | 73.244      | 0.255555556 HLA-A*02:01 | KNLOQPMYFF  | KNLOQPMYFI  | 7092.3  | 149.4 |
| RJLC3-T3 | MC2R        | NM_000529:exon2:c.T184A;p.F62I       | 18 | 13885334  | A | T | 0.23  | 73.244      | 0.255555556 HLA-A*02:01 | NLQAPMYFF   | NLQAPMYFI   | 3530.4  | 46.9  |
| RJLC3-T3 | C18orf63    | NM_001174123:exon3:c.G221C;p.A71P    | 18 | 71987824  | G | C | 0.11  | 0.425694444 | 0.073611111 HLA-A*02:01 | ILNQIWWVMAI | ILNQIWWVMPI | 817.6   | 301.3 |
| RJLC3-T3 | C18orf63    | NM_001174123:exon3:c.G221C;p.A71P    | 18 | 71987824  | G | C | 0.11  | 0.425694444 | 0.073611111 HLA-A*02:01 | LNQIWWVMAI  | LNQIWWVMPI  | 409.5   | 147.0 |
| RJLC3-T3 | C18orf63    | NM_001174123:exon3:c.G221C;p.A71P    | 18 | 71987824  | G | C | 0.11  | 0.425694444 | 0.073611111 HLA-A*02:01 | NQIWWVMAI   | NQIWWVMPI   | 105.7   | 33.6  |
| RJLC3-T3 | MPP1        | NM_00116640:exon1:c.C43A;p.H15N      | X  | 154033606 | G | T | 0.134 | 0.784722222 | 0.110416667 HLA-A*02:01 | SMHTALS DL  | SMHTALS DL  | 96.4    | 47.1  |
| RJLC3-T3 | FSTL1       | NM_007085:exon10:c.G806A;p.G269E     | 3  | 120118806 | C | T | 0.127 | 0.743055556 | 0.099305556 HLA-A*11:01 | VTAMTCDGK   | VTAMTCDCK   | 306.4   | 258.2 |
| RJLC3-T3 | PCDH13      | NM_018933:exon1:c.C889T;p.P297S      | 5  | 140594584 | C | T | 0.082 | 26.292      | 0.2375 HLA-A*11:01      | NPLTGEIELK  | NLSLGEIELK  | 9636.1  | 264   |
| RJLC3-T3 | PCDH13      | NM_018933:exon1:c.C889T;p.P297S      | 5  | 140594584 | C | T | 0.082 | 26.292      | 0.2375 HLA-A*11:01      | PLTGEIELKK  | PLTGEIELKK  | 2531.3  | 173.7 |
| RJLC3-T3 | PCDH13      | NM_018933:exon1:c.C889T;p.P297S      | 5  | 140594584 | C | T | 0.082 | 26.292      | 0.2375 HLA-A*11:01      | PLTGEIELK   | SLTGEIELK   | 10884.2 | 272.1 |
| RJLC3-T3 | PLEC        | NM_201378:exon25:c.C3200A;p.S1067Y   | 8  | 145003289 | G | T | 0.091 | 4.40        | 0.47 HLA-A*11:01        | SLSAIYLELK  | SLVAIYLELK  | 15.9    | 74.8  |
| RJLC3-T3 | PLEC        | NM_201378:exon25:c.C3200A;p.S1067Y   | 8  | 145003289 | G | T | 0.091 | 4.40        | 0.47 HLA-A*11:01        | SLSAIYLELK  | SLVAIYLELK  | 8.2     | 7.6   |
| RJLC3-T3 | KRAS        | NM_004985:exon2:c.G34T;p.G12C        | 12 | 25398285  | C | A | 0.37  | 74.126      | 0.140277778 HLA-A*11:01 | VVVGAGGVGK  | VVVGAGGVGK  | 271.4   | 165.8 |
| RJLC3-T3 | KRAS        | NM_004985:exon2:c.G34T;p.G12C        | 12 | 25398285  | C | A | 0.37  | 74.126      | 0.140277778 HLA-A*11:01 | VVVGAGGVGK  | VVVGAGGVGK  | 139.3   | 90.6  |
| RJLC3-T3 | ALDH1A3     | NM_000693:exon13:c.G1477A;p.A493T    | 15 | 101454916 | G | A | 0.036 | 0.725       | 0.252777778 HLA-A*11:01 | YLALEYTEVK  | YTLALEYTEV  | 416.4   | 74.3  |
| RJLC3-T3 | C18orf63    | NM_001174123:exon3:c.G221C;p.A71P    | 18 | 71987824  | G | C | 0.11  | 0.425694444 | 0.073611111 HLA-A*11:01 | VVWMAIPFYKA | VVWMAIPFYKY | 11.1    | 10.1  |
| RJLC3-T3 | C18orf63    | NM_001174123:exon3:c.G221C;p.A71P    | 18 | 71987824  | G | C | 0.11  | 0.425694444 | 0.073611111 HLA-A*11:01 | VVWMAIPFYKA | VVWMAIPFYKY | 197.1   | 152.6 |
| RJLC3-T3 | C18orf63    | NM_001174123:exon3:c.G221C;p.A71P    | 18 | 71987824  | G | C | 0.11  | 0.425694444 | 0.073611111 HLA-A*11:01 | VVWMAIPFYKA | VVWMAIPFYKY | 6.2     | 5.8   |
| RJLC3-T3 | FUT3        | NM_001097641:exon2:c.A1007C;p.D336A  | 19 | 5843844   | T | G | 0.06  | 3.47        | 1:47 HLA-A*11:01        | SFSWALDFCK  | SFSWALDFCK  | 35.6    | 28.5  |
| RJLC3-T3 | FUT3        | NM_001097641:exon2:c.A1007C;p.D336A  | 19 | 5843844   | T | G | 0.06  | 3.47        | 1:47 HLA-A*11:01        | SFSWALDFCK  | SFSWALDFCK  | 37.6    | 13.5  |
| RJLC3-T3 | FUT3        | NM_001097641:exon2:c.A1007C;p.D336A  | 19 | 5843844   | T | G | 0.06  | 3.47        | 1:47 HLA-A*11:01        | ALDFCKACWK  | ALDFCKACWK  | 146.7   | 64.0  |
| RJLC3-T3 | FUT3        | NM_001097641:exon2:c.A1007C;p.D336A  | 19 | 5843844   | T | G | 0.06  | 3.47        | 1:47 HLA-A*11:01        | SFSWALDF    | SFSWALDF    | 1138.2  | 486.1 |
| RJLC3-T3 | FUT3        | NM_001097641:exon2:c.A1007C;p.D336A  | 19 | 5843844   | T | G | 0.06  | 3.47        | 1:47 HLA-A*11:01        | SFSWALDFCK  | SFSWALDFCK  | 52.7    | 23.7  |
| RJLC3-T3 | FUT3        | NM_001097641:exon2:c.A1007C;p.D336A  | 19 | 5843844   | T | G | 0.06  | 3.47        | 1:47 HLA-A*11:01        | LDFCKACWK   | LDFCKACWK   | 3242.2  | 724.4 |
| RJLC3-T3 | MPP1        | NM_00116640:exon1:c.C43A;p.H15N      | X  | 154033606 | G | T | 0.134 | 0.784722222 | 0.110416667 HLA-A*11:01 | GSMHTALS DL | GSMHTALS DL | 370.9   | 314.3 |
| RJLC3-T3 | MPP1        | NM_00116640:exon1:c.C43A;p.H15N      | X  | 154033606 | G | T | 0.134 | 0.784722222 | 0.110416667 HLA-A*11:01 | SMHTALS DL  | SMHTALS DL  | 683.2   | 452.8 |
| RJLC3-T3 | LAMB2       | NM_002292:exon17:c.C2281T;p.P761S    | 3  | 49163463  | A | G | 0.15  | 30.170      | 0.135416667 HLA-B*13:01 | PSEACAPL    | PSEACAPLI   | 1142.7  | 328.5 |
| RJLC3-T3 | PLEC        | NM_201378:exon25:c.C3200A;p.S1067Y   | 8  | 145003289 | G | T | 0.091 | 4.40        | 0.47 HLA-B*13:01        | LEQVRSLSAI  | LEQVRSLSAI  | 953     | 317.6 |
| RJLC3-T3 | PLEC        | NM_201378:exon25:c.C3200A;p.S1067Y   | 8  | 145003289 | G | T | 0.091 | 4.40        | 0.47 HLA-B*13:01        | EQVRSLSAI   | EQVRSLSAI   | 1165.5  | 194   |
| RJLC3-T3 | LAMB2       | NM_002292:exon17:c.C2281T;p.P761S    | 3  | 49163463  | A | G | 0.15  | 30.170      | 0.135416667 HLA-C*03:04 | SPSEACAPL   | SSSEACAPL   | 638.8   | 33.9  |
| RJLC3-T3 | TMEM245     | NM_032012:exon15:c.T2210C;p.V737A    | 9  | 111800311 | A | G | 0.043 | 0.797916667 | 0.272222222 HLA-C*03:04 | NIAPFISAL   | NIAPFISAL   | 671     | 419.2 |
| RJLC3-T3 | TMEM245     | NM_032012:exon15:c.T2210C;p.V737A    | 9  | 111800311 | A | G | 0.043 | 0.797916667 | 0.272222222 HLA-C*03:04 | IVFISAL     | IFAPISAL    | 2381.1  | 494.5 |
| RJLC4-T1 | RSG1        | NM_003907:exon4:c.G505A;p.V169I      | 1  | 16599207  | C | T | 0.122 | 0.420138889 | 0.046527778 HLA-A*11:01 | GVVRMVGSK   | GVVRMVGSK   | 81.5    | 46    |
| RJLC4-T1 | SRSF11      | NM_001190987:exon7:c.T597G;p.N199K   | 1  | 70703114  | T | G | 0.194 | 12.50       | 0.04375 HLA-A*11:01     | KLMSTVDPKLN | KLMSTVDPKLN | 8648.5  | 336.3 |
| RJLC4-T1 | SRSF11      | NM_001190987:exon7:c.T597G;p.N199K   | 1  | 70703114  | T | G | 0.194 | 12.50       | 0.04375 HLA-A*11:01     | LMSTVDPKLN  | LMSTVDPKLN  | 33738.4 | 240.6 |
| RJLC4-T1 | LRIG2       | NM_014813:exon12:c.C1421C;p.P474R    | 1  | 113650323 | C | G | 0.216 | 61.222      | 0.145138889 HLA-A*11:01 | SVNVSCHAP   | SVNVSCHAP   | 28463.9 | 363   |
| RJLC4-T1 | NBPF8       | NM_001037501:exon12:c.T1121G;p.M574R | 1  | 148017582 | A | C | 0.25  | 3.09        | 1:13 HLA-A*11:01        | STLSIPPER   | STLSIPPER   | 6287.6  | 80.2  |
| RJLC4-T1 | SULT1C3     | NM_001008743:exon1:c.C297T;p.T10M    | 2  | 108863679 | C | T | 0.152 | 48.267      | 0.281944444 HLA-A*11:01 | KIEKNAPTMEK | KIEKNAPMMEK | 134     | 118.1 |
| RJLC4-T1 | ZFP62       | NM_001172638:exon2:c.T2399G;p.L80R   | 5  | 160276096 | A | C | 0.328 | 79.162      | 0.154861111 HLA-A*11:01 | KAYISHSSL   | KAYISHSSR   | 22978.2 | 256.4 |
| RJLC4-T1 | RP1-257A7.4 | NM_001242698:exon4:c.G186C;p.M62I    | 6  | 13281740  | G | C | 0.19  | 0.713888889 | 0.045138889 HLA-A*11:01 | AMISAHCNLR  | AISAHCNLR   | 415.6   | 254.1 |
| RJLC4-T1 | VPS13B      | NM_017890:exon48:c.A8849C;p.N2950T   | 8  | 100831792 | A | C | 0.08  | 0.645833333 | 0.122222222 HLA-A*11:01 | SLOPIWPYK   | SLOPIWPYK   | 148.3   | 141.5 |
| RJLC4-T1 | VPS13B      | NM_017890:exon48:c.A8849C;p.N2950T   | 8  | 100831792 | A | C | 0.08  | 0.645833333 | 0.122222222 HLA-A*11:01 | SLOPIWPYK   | SLOPIWPYK   | 25.7    | 21.9  |
| RJLC4-T1 | VPS13B      | NM_017890:exon48:c.A8849C;p.N2950T   | 8  | 100831792 | A | C | 0.08  | 0.645833333 | 0.122222222 HLA-A*11:01 | SLOPIWPYK   | SLOPIWPYK   | 494.4   | 35.3  |
| RJLC4-T1 | HHLA1       | NM_001145095:exon8:c.C561G;p.I187M   | 8  | 133100120 | G | C | 0.341 | 72.139      | 0.152777778 HLA-A*11:01 | IFICVMTGK   | MFICVMTGK   | 701.1   | 317.4 |
| RJLC4-T1 | C9orf3      | NM_001193329:exon1:c.T41G;p.L14R     | 9  | 97522106  | T | G | 0.108 | 0.852777778 | 0.127777778 HLA-A*11:01 | LMAMTSHLVK  | RMAMTSHLVK  | 333.4   | 189.8 |
| RJLC4-T1 | COQ4        | NM_016035:exon2:c.A188G;p.N63S       | 9  | 131085412 | A | G | 0.123 | 0.652777778 | 0.045138889 HLA-A*11:01 | SAAMALYNPYR | SAAMALYSPYR | 495.7   | 396.9 |
| RJLC4-T1 | COQ4        | NM_016035:exon2:c.A188G;p.N63S       | 9  | 131085412 | A | G | 0.123 | 0.652777778 | 0.045138889 HLA-A*11:01 | SAAMALYNPYR | SAAMALYSPYR | 242.3   | 161.6 |
| RJLC4-T1 | COQ4        | NM_016035:exon2:c.A188G;p.N63S       | 9  | 131085412 | A | G | 0.123 | 0.652777778 | 0.045138889 HLA-A*11:01 | SAAMALYNPYR | SAAMALYSPYR | 36.9    | 25.2  |
| RJLC4-T1 | COQ4        | NM_016035:exon2:c.A188G;p.N63S       | 9  | 131085412 | A | G | 0.123 | 0.652777778 | 0.045138889 HLA-A*11:01 | SAAMALYNPYR | SAAMALYSPYR | 78.1    | 49.4  |
| RJLC4-T1 | COQ4        | NM_016035:exon2:c.A188G;p.N63S       | 9  | 131085412 | A | G | 0.123 | 0.652777778 | 0.045138889 HLA-A*11:01 | AMALYNPYR   | AMALYSPYR   | 83      | 54.9  |
| RJLC4-T1 | MED27       | NM_004269:exon5:c.G607T;p.V203F      | 9  | 134769346 | C | A | 0.1   | 0.622916667 | 0.095833333 HLA-A*11:01 | IVMRSFLDR   | IVMRSFLDR   | 1601    | 314.8 |
| RJLC4-T1 | MED27       | NM_004269:exon5:c.G607T;p.V203F      | 9  | 134769346 | C | A | 0.1   | 0.622916667 | 0.095833333 HLA-A*11:01 | KVLRVIVMR   | KVLRVIVMR   | 661.6   | 186.3 |
| RJLC4-T1 | SCUBE2      | NM_001170690:exon18:c.G2411C;p.R804T | 11 | 9042605   | C | G | 0.148 | 31.178      | 0.176388889 HLA-A*11:01 | SKVSRFLRPYK | SKVSRFLRPYK | 198     | 97.8  |
| RJLC4-T1 | SCUBE2      | NM_001170690:exon18:c.G2411C;p.R804T | 11 | 9042605   | C | G | 0.148 | 31.178      | 0.176388889 HLA-A*11:01 | SKVSRFLRPYK | SKVSRFLRPYK | 292.5   | 106.8 |
| RJLC4-T1 | SCUBE2      | NM_001170690:exon18:c.G2411C;p.R804T | 11 | 9042605   | C | G | 0.148 | 31.178      | 0.176388889 HLA-A*11:01 | SKVSRFLRPYK | SKVSRFLTPYK | 11.7    | 8.7   |
| RJLC4-T1 | SCUBE2      | NM_001170690:exon18:c.G2411C;p.R804T | 11 | 9042605   | C | G | 0.148 | 31.178      | 0.17                    |             |             |         |       |

|          |         |                                       |    |           |   |   |       |             |             |             |             |             |         |       |
|----------|---------|---------------------------------------|----|-----------|---|---|-------|-------------|-------------|-------------|-------------|-------------|---------|-------|
| RJLC4-T1 | MED27   | NM_004269:exon5:c.G607T.p.V203F       | 9  | 134769346 | C | A | 0.1   | 0.622916667 | 0.095833333 | HLA-C*03:04 | IVVMRSLFI   | IVFMRSLFI   | 1310.5  | 488.4 |
| RJLC4-T1 | GPRC5A  | NM_003979:exon2:c.T133A.p.F45I        | 12 | 13061316  | T | A | 0.24  | 56.177      | 0.284027778 | HLA-C*03:04 | VAFMLTLPI   | VAIMLTLPI   | 15.6    | 13.5  |
| RJLC4-T1 | TMC3    | NM_001080532:exon14:c.C1535A.p.S512Y  | 15 | 81636370  | G | T | 0.193 | 37.155      | 0.101388889 | HLA-C*03:04 | SIIDMLFTV   | YIIDMLFTV   | 886.7   | 156   |
| RJLC4-T1 | S1PR5   | NM_001166215:exon2:c.A298G.p.T100A    | 19 | 10625390  | T | C | 0.151 | 34.191      | 0.2125      | HLA-C*03:04 | ILLSGPLTL   | ILLSGPLAL   | 89.9    | 52.6  |
| RJLC4-T1 | S1PR5   | NM_001166215:exon2:c.A298G.p.T100A    | 19 | 10625390  | T | C | 0.151 | 34.191      | 0.2125      | HLA-C*03:04 | LTLKSPAL    | LALKSPAL    | 71.5    | 15.9  |
| RJLC4-T2 | SRSF11  | NM_001190987:exon7:c.T597G.p.N199K    | 1  | 70703114  | T | G | 0.141 | 9.55        | 0.04375     | HLA-A*11:01 | KLMSTVDPKLN | KLMSTVDPKLN | 8648.5  | 336.3 |
| RJLC4-T2 | SRSF11  | NM_001190987:exon7:c.T597G.p.N199K    | 1  | 70703114  | T | G | 0.141 | 9.55        | 0.04375     | HLA-A*11:01 | LMSTVDPKLN  | LMSTVDPKLN  | 33738.4 | 240.6 |
| RJLC4-T2 | ADCY10  | NM_018417:exon4:c.G2611T.p.L87F       | 1  | 167871285 | C | A | 0.145 | 9.53        | 0.102083333 | HLA-A*11:01 | KVLFSGDILK  | KVIFSGDILK  | 201.3   | 116.6 |
| RJLC4-T2 | CCDC132 | NM_017667:exon25:c.A2460C.p.L820F     | 7  | 92979342  | A | C | 0.076 | 0.551388889 | 0.132638889 | HLA-A*11:01 | QHNIYVDALLK | QHNIYVDALFK | 810.7   | 375.5 |
| RJLC4-T2 | CCDC132 | NM_017667:exon25:c.A2460C.p.L820F     | 7  | 92979342  | A | C | 0.076 | 0.551388889 | 0.132638889 | HLA-A*11:01 | HNIYVDALLK  | HNIYVDALFK  | 73      | 32.4  |
| RJLC4-T2 | CCDC132 | NM_017667:exon25:c.A2460C.p.L820F     | 7  | 92979342  | A | C | 0.076 | 0.551388889 | 0.132638889 | HLA-A*11:01 | NIYVDALLK   | NIYVDALFK   | 51.9    | 24.4  |
| RJLC4-T2 | MYOF    | NM_133337:exon34:c.A3833C.p.Y1278S    | 10 | 95111003  | T | G | 0.085 | 0.736805556 | 0.139583333 | HLA-A*11:01 | LYMVPQGIT   | LSMVPQGIT   | 9937.8  | 479.3 |
| RJLC4-T2 | UBL7    | NM_001286740:exon5:c.A397G.p.M133V    | 15 | 74743852  | T | C | 0.034 | 0.36875     | 0.144444444 | HLA-A*11:01 | AVFKMLSNKE  | AVFKVLSNKE  | 224.9   | 221.9 |
| RJLC4-T2 | KCNQ5   | NM_001160134:exon10:c.T1260G.p.F420L  | 6  | 73900308  | T | G | 0.115 | 0.422916667 | 0.067361111 | HLA-B*40:01 | GEASSRIMKF  | GEASSRIMKL  | 508.4   | 93.2  |
| RJLC4-T2 | C5      | NM_001735:exon8:c.T765G.p.F255L       | 9  | 123789546 | A | C | 0.111 | 0.425       | 0.055555556 | HLA-B*40:01 | FEITIKARYF  | FEITIKARYL  | 1198.4  | 112.4 |
| RJLC4-T2 | UBL7    | NM_001286740:exon5:c.A397G.p.M133V    | 15 | 74743852  | T | C | 0.034 | 0.36875     | 0.144444444 | HLA-B*40:01 | REAVFKML    | REAVFKVL    | 720.9   | 326.3 |
| RJLC4-T2 | LMO7    | NM_015842:exon1:c.A1887T.p.E1224V     | 13 | 76427233  | A | T | 0.055 | 0.804166667 | 0.224305556 | HLA-B*55:02 | LPGIMRRGE   | YVLMRRGE    | 9281.9  | 355.4 |
| RJLC4-T2 | NAA11   | NM_032693:exon1:c.A1887T.p.E63V       | 4  | 80246844  | T | A | 0.035 | 0.605555556 | 0.220833333 | HLA-C*03:04 | YVLAKMEEE   | YVLAKMEEV   | 18273.4 | 248   |
| RJLC4-T2 | SLC9B1  | NM_001100874:exon6:c.A651C.p.L217F    | 4  | 103866352 | T | G | 0.168 | 0.811805556 | 0.127083333 | HLA-C*03:04 | WAFLLGFVL   | WAFLLGFVL   | 103     | 94.9  |
| RJLC4-T2 | CCDC132 | NM_017667:exon25:c.A2460C.p.L820F     | 7  | 92979342  | A | C | 0.076 | 0.551388889 | 0.132638889 | HLA-C*03:04 | YVDALLKEF   | YVDALFKEF   | 383.6   | 227.9 |
| RJLC4-T2 | PAK6    | NM_001276717:exon3:c.C224T.p.A75V     | 15 | 40558062  | C | T | 0.066 | 0.669444444 | 0.151388889 | HLA-C*03:04 | VVRGSAIMPV  | VVRGSAIMPV  | 435     | 419.9 |
| RJLC4-T3 | MROH7   | NM_001039464:exon19:c.C3214T.p.R1072W | 1  | 55166924  | C | T | 0.103 | 0.381944444 | 0.063888889 | HLA-A*11:01 | KAVFKGRDQK  | KAVFKGVDQK  | 243.9   | 129.5 |
| RJLC4-T3 | MROH7   | NM_001039464:exon19:c.C3214T.p.R1072W | 1  | 55166924  | C | T | 0.103 | 0.381944444 | 0.063888889 | HLA-A*11:01 | AVFKGRDQK   | AVFKGVDQK   | 23.3    | 15.7  |
| RJLC4-T3 | SRSF11  | NM_001190987:exon7:c.T597G.p.N199K    | 1  | 70703114  | T | G | 0.167 | 8.40        | 0.04375     | HLA-A*11:01 | KLMSTVDPKLN | KLMSTVDPKLN | 8648.5  | 336.3 |
| RJLC4-T3 | SRSF11  | NM_001190987:exon7:c.T597G.p.N199K    | 1  | 70703114  | T | G | 0.167 | 8.40        | 0.04375     | HLA-A*11:01 | LMSTVDPKLN  | LMSTVDPKLN  | 33738.4 | 240.6 |
| RJLC4-T3 | HSD3B1  | NM_000862:exon4:c.C689T.p.A230V       | 1  | 120056835 | C | T | 0.042 | 0.402083333 | 0.114583333 | HLA-A*11:01 | VVAHALALR   | VVAHALALR   | 322.8   | 204.6 |
| RJLC4-T3 | MRS2    | NM_001286266:exon3:c.A266T.p.Y89F     | 6  | 24412451  | A | T | 0.296 | 8.19        | 1.28        | HLA-A*11:01 | SVAPVFTVYK  | SVAPVFTVFK  | 17.2    | 13.2  |
| RJLC4-T3 | MRS2    | NM_001286266:exon3:c.A266T.p.Y89F     | 6  | 24412451  | A | T | 0.296 | 8.19        | 1.28        | HLA-A*11:01 | VAPVFTVYK   | VAPVFTVFK   | 55.6    | 37.9  |
| RJLC4-T3 | ALDH1A3 | NM_000693:exon9:c.C997T.p.R333W       | 15 | 101440893 | C | T | 0.05  | 0.439583333 | 0.120833333 | HLA-A*11:01 | FVRSVVEYAK  | FVRSVVEYAK  | 267.8   | 127.3 |
| RJLC4-T3 | MRS2    | NM_001286266:exon3:c.A266T.p.Y89F     | 6  | 24412451  | A | T | 0.296 | 8.19        | 1.28        | HLA-B*55:02 | APVFTVYKA   | APVFTVYKA   | 203.9   | 112.7 |
| RJLC4-T3 | TTC21B  | NM_024753:exon18:c.A2456C.p.E819A     | 2  | 166767842 | T | G | 0.128 | 0.463888889 | 0.109722222 | HLA-C*03:04 | LAHEPVNEL   | LAHAPVNEL   | 11.9    | 10.2  |
| RJLC4-T3 | MUC4    | NM_018406:exon2:c.C6506T.p.A2169V     | 3  | 195511945 | G | A | 0.333 | 2.04        | 0.10        | HLA-C*03:04 | ASTGHATSL   | VSTGHATSL   | 51.7    | 25.6  |
| RJLC4-T3 | SLC9B1  | NM_001100874:exon6:c.A651C.p.L217F    | 4  | 103866352 | T | G | 0.167 | 0.8125      | 0.127083333 | HLA-C*03:04 | WAFLLGFVL   | WAFLLGFVL   | 103     | 94.9  |
| RJLC4-T3 | MRS2    | NM_001286266:exon3:c.A266T.p.Y89F     | 6  | 24412451  | A | T | 0.296 | 8.19        | 1.28        | HLA-C*03:04 | SVAPVFTVY   | SVAPVFTVY   | 757.8   | 47.8  |
| RJLC4-T3 | EML3    | NM_153265:exon19:c.A2246C.p.E749A     | 11 | 62371212  | T | G | 0.093 | 0.532638889 | 0.060416667 | HLA-C*03:04 | MSNSGDYEI   | MSNSGDYAI   | 150     | 53.8  |
| RJLC4-T3 | MGA     | NM_001164273:exon15:c.A5167C.p.I1723L | 15 | 42035325  | A | C | 0.096 | 0.675       | 0.13125     | HLA-C*03:04 | SSLGSPVPI   | SSLGSPVPI   | 246.1   | 75.9  |



**Supplementary Table 5: Clonal numbers inferred by PyClone or SciClone analyses**

| <b>Sample ID</b> | <b>PyClone</b> | <b>SciClone</b> |
|------------------|----------------|-----------------|
| RJLC1-T1R1       | 2              | 1               |
| RJLC1-T1R2       | 3              | 3               |
| RJLC1-T1R3       | 2              | 2               |
| RJLC1-T1R4       | 2              | 3               |
| RJLC1-T2         | 2              | 3               |
| RJLC2-T1         | 2              | 1               |
| RJLC2-T2         | 2              | 1               |
| RJLC2-T3         | 2              | 2               |
| RJLC3-T1         | 4              | 5               |
| RJLC3-T2         | 2              | 6               |
| RJLC3-T3         | 4              | 4               |
| RJLC4-T1R1       | 5              | 4               |
| RJLC4-T1R2       | 4              | 4               |
| RJLC4-T1R3       | 5              | 3               |
| RJLC4-T2         | 2              | 1               |
| RJLC4-T3         | 3              | 6               |

**Supplementary Table 6: Branch:trunk indices (ITB) from WES for MSLCs**

| <b>Patient ID</b> | <b>Age</b> | <b>Sex</b> | <b>TNM stage</b> | <b>Smoking status</b> | <b>branch/trunk</b> | <b>ITB</b> |
|-------------------|------------|------------|------------------|-----------------------|---------------------|------------|
| RJLC1-T1          | 64         | Female     | pTisN0M0         | Never                 | 30/23               | 1.304      |
| RJLC4-T1          | 60         | Female     | pT1N0M0          | Never                 | 60/35               | 1.714      |
| L001              | 59         | Female     | pT2aN1M0         | Former                | 4/15                | 0.267      |
| L002              | 78         | Male       | pT3N2M0          | Current               | 16/12               | 1.333      |
| L004              | 73         | Male       | pT3N0M0          | Current               | 7/23                | 0.304      |
| L011              | 49         | Female     | pT2aN0M0         | Current               | 3/29                | 0.103      |
| LS01              | 69         | Male       | pT2aN0M0         | Former                | 3/24                | 0.125      |
| 317               | 55         | Male       | N0               | Former                | 16/1424             | 0.011      |
| 499               | 73         | Female     | N0               | Former                | 2/98                | 0.02       |
| 292               | 57         | Female     | N0               | Never                 | 2/20                | 0.1        |
| 324               | 68         | Female     | N0               | Current               | 23/147              | 0.156      |
| 283               | 50         | Male       | N2               | Former                | 2/11                | 0.182      |
| 339               | 73         | Male       | N0               | Never                 | 13/40               | 0.325      |
| 472               | 74         | Female     | N0               | Former                | 16/41               | 0.39       |
| 330               | 59         | Female     | N0               | Former                | 116/223             | 0.52       |
| 4990              | 75         | Male       | N1               | Former                | 107/138             | 0.775      |
| 270               | 62         | Female     | N1               | Former                | 71/72               | 0.986      |
| 356               | 69         | Female     | N0               | Never                 | 27/27               | 1          |

## Supplementary Table 7: Mutation co-occurrence in the same cancer gene of MSLC

|             | Pa1  |      | Pa4   |       | Pa5   |       | Pa6   |       |       | L003  |       |
|-------------|------|------|-------|-------|-------|-------|-------|-------|-------|-------|-------|
|             | T1   | T3   | T1    | T2    | T1    | T2    | T1    | T2    | T3    | R2    | R4    |
| <b>EGFR</b> |      |      | L858R | S229C | L858R | L858R | L858R | L858R | L858R | L858R | L858R |
| <b>KRAS</b> | G12A | G12V |       |       |       |       |       |       |       |       |       |

Pa1,4,5,6 (Liu, Y. et al. Genomic heterogeneity of multiple synchronous lung cancer. *Nat Commun* 7, 13200 (2016))

L003 (de Bruin, E.C. et al. Spatial and temporal diversity in genomic instability processes defines lung cancer evolution. *Science* 346, 251-256 (2014))
